# Supplementary material for: Less effective selection leads to larger genomes
Source: HighWire-hosted journal article supplement (doi:10.1101/gr.212589.116), 2017-04-19
Supplement: Supplemental_Figures_Tables.pdf [file Supplemental_Figures_Tables.pdf]

# Less effective selection leads to larger genomes

## Supplemental Material

Tristan Lefébure<sup>1</sup>, Claire Morvan<sup>1</sup>, Florian Malard<sup>1</sup>, Clémentine François<sup>1</sup>, Lara Konecny-Dupré<sup>1</sup>, Laurent Guéguen<sup>4</sup>, Michèle Weiss-Gayet<sup>2</sup>, Andaine Seguin-Orlando<sup>3</sup>, Luca Ermini<sup>3</sup>, Clio Der Sarkissian<sup>3</sup>, N. Pierre Charrier<sup>1</sup>, David Eme<sup>1</sup>, Florian Mermillod-Blondin<sup>1</sup>, Laurent Duret<sup>4</sup>, Cristina Vieira<sup>4,5</sup>, Ludovic Orlando<sup>3,6</sup>, and Christophe Jean Douady<sup>1,5</sup>

<sup>1</sup>*Univ Lyon, Université Claude Bernard Lyon 1, CNRS UMR 5023, ENTPE, Laboratoire d'Ecologie des Hydrosystèmes Naturels et Anthropisés, F-69622 Villeurbanne, France*

<sup>2</sup>*Univ Lyon, Université Claude Bernard Lyon 1, CNRS UMR 5310, INSERM, Institut NeuroMyoGène, F-69622 Villeurbanne, France*

<sup>3</sup>*Center for GeoGenetics, Natural History Museum of Denmark, University of Copenhagen, Øster Voldgade 5-7, 1350K Copenhagen, Denmark*

<sup>4</sup>*Univ Lyon, Université Claude Bernard Lyon 1, CNRS UMR 5558, Laboratoire de Biométrie et Biologie Evolutive, F-69622 Villeurbanne, France*

<sup>5</sup>*Institut Universitaire de France, F-75005 Paris, France*

<sup>6</sup>*Université de Toulouse, University Paul Sabatier (UPS), CNRS UMR 5288, Laboratoire AMIS, F-31073 Toulouse, France*

March 23, 2017

## List of Figures

|    |                                                                                                                                                   |    |
|----|---------------------------------------------------------------------------------------------------------------------------------------------------|----|
| 1  | Transcriptome-wide $d_N/d_S$ distributions . . . . .                                                                                              | 3  |
| 2  | Variation in the gene $d_N/d_S$ . . . . .                                                                                                         | 4  |
| 3  | Correlation between the transcriptome-wide $d_N/d_S$ and $w_0$ . . . . .                                                                          | 5  |
| 4  | <i>DoS</i> distributions . . . . .                                                                                                                | 5  |
| 6  | Opsin $d_N/d_S$ and expression in surface and subterranean taxa . . . . .                                                                         | 6  |
| 7  | Comparisons of transcriptome-wide expression . . . . .                                                                                            | 7  |
| 8  | Covariation between eye or pigmentation phenotypes and estimated colonization times . . . . .                                                     | 10 |
| 9  | Correlation between Genome size and $d_N/d_S$ , growth rate or body size . . . . .                                                                | 11 |
| 10 | Differences in gene copy number within the species pairs . . . . .                                                                                | 12 |
| 11 | Cumulative repeated element size distributions . . . . .                                                                                          | 13 |
| 12 | Repeated element frequencies in 22 Asellidae species . . . . .                                                                                    | 14 |
| 13 | Differences in polymorphism between the surface and subterranean species of a pair as a function of polymorphism in the surface species . . . . . | 15 |
| 14 | Transcriptome assembly quality . . . . .                                                                                                          | 16 |

## List of Tables

|   |                                                                                                                                               |    |
|---|-----------------------------------------------------------------------------------------------------------------------------------------------|----|
| 1 | Description of the 11 Aselloidea species pairs . . . . .                                                                                      | 17 |
| 2 | Estimates of the transcriptome-wide $d_N/d_S$ using a branch model and using a branch-site model . . . . .                                    | 18 |
| 3 | Transcriptome single nucleotide polymorphism . . . . .                                                                                        | 19 |
| 4 | Gene expression changes in the core-genes . . . . .                                                                                           | 19 |
| 5 | Opsin $d_N/d_S$ and estimated colonization time . . . . .                                                                                     | 20 |
| 6 | Genome sizes for 47 species of Metazoa . . . . .                                                                                              | 21 |
| 7 | Test of the influence of genome size, ecological status and phylogenetic signal in structuring the frequencies of repeated elements . . . . . | 23 |
| 8 | Tajima'D test . . . . .                                                                                                                       | 23 |
| 9 | Aselloidea sequences used to reconstruct phylogenetic relationships . . . . .                                                                 | 23 |

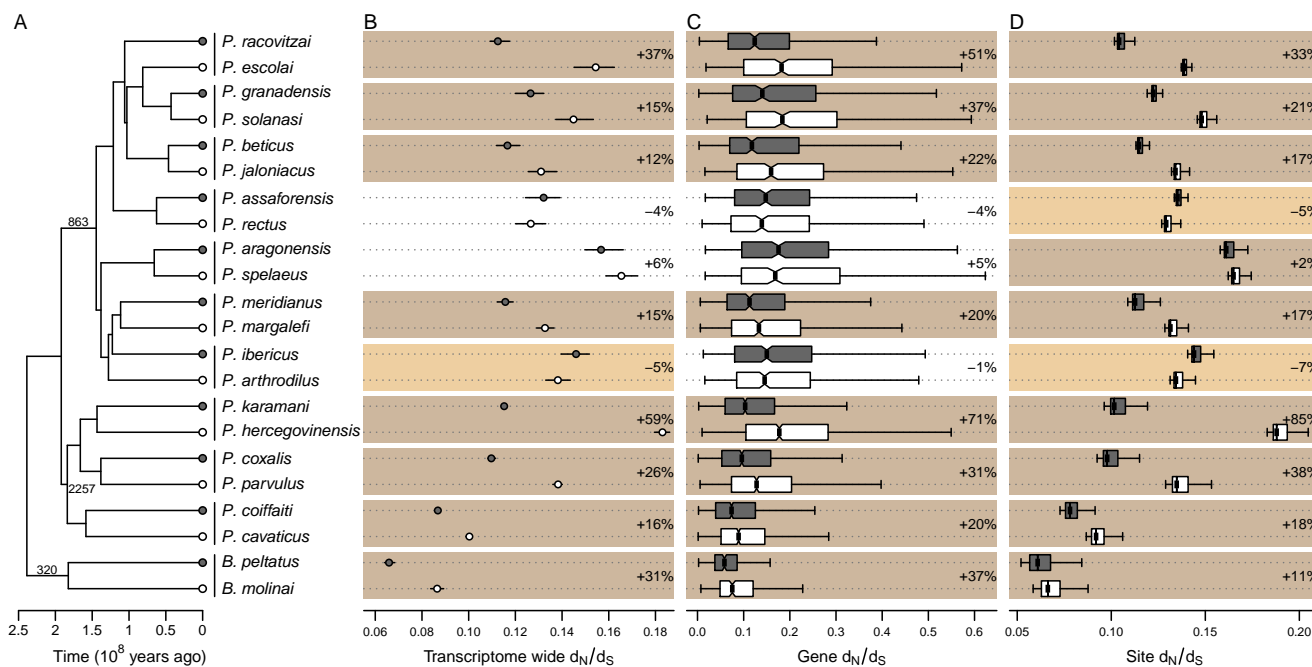

**Figure S1:** Evolution of the transcriptome-wide  $d_N/d_S$  (one global measure per taxa, B) and the distribution of  $d_N/d_S$  measured across genes (C) or across sites (D) for each surface and subterranean species (A). Legends are the same as in fig. 1. The percentage of variations displayed in panel C and D are between the median of the gene or site distributions, i.e. for  $i$  genes or sites, the median of  $(w_{i\text{subterranean}} - w_{i\text{surface}})/w_{i\text{surface}}$  distribution.

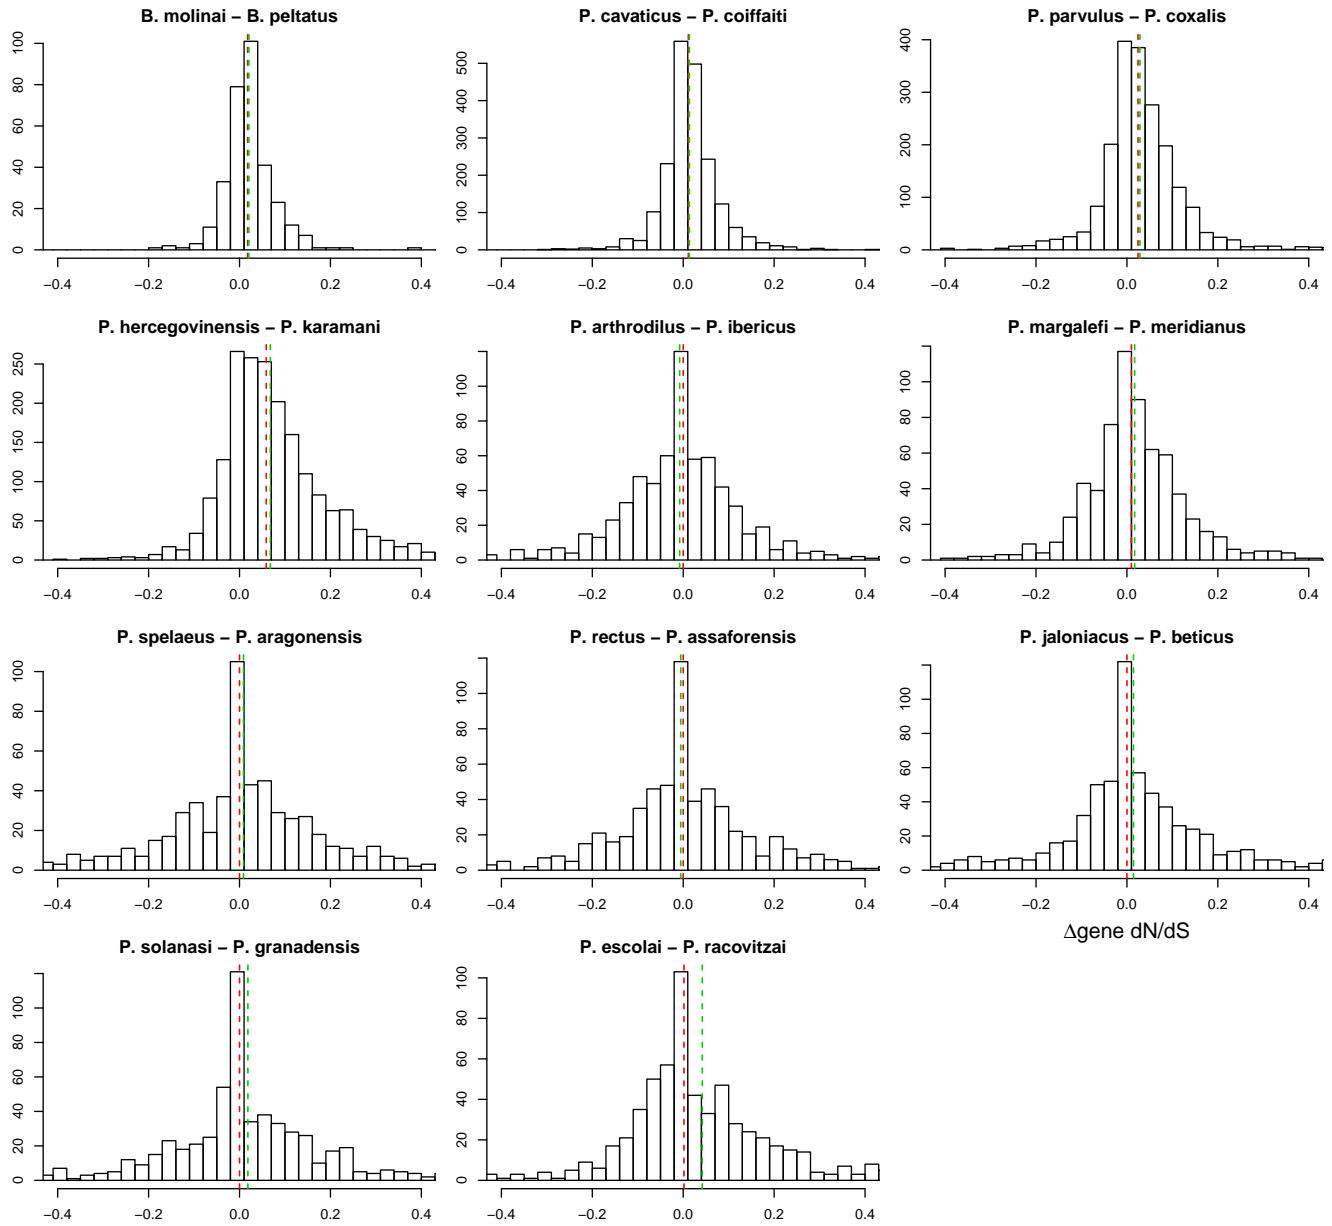

**Figure S2:** Distribution of gene  $d_N/d_S$  differences between subterranean and surface species ( $w_{i\text{subterranean}} - w_{i\text{surface}}$ ). The dotted vertical lines indicate the median of the distribution (red) and the transcriptome-wide  $d_N/d_S$  (green).

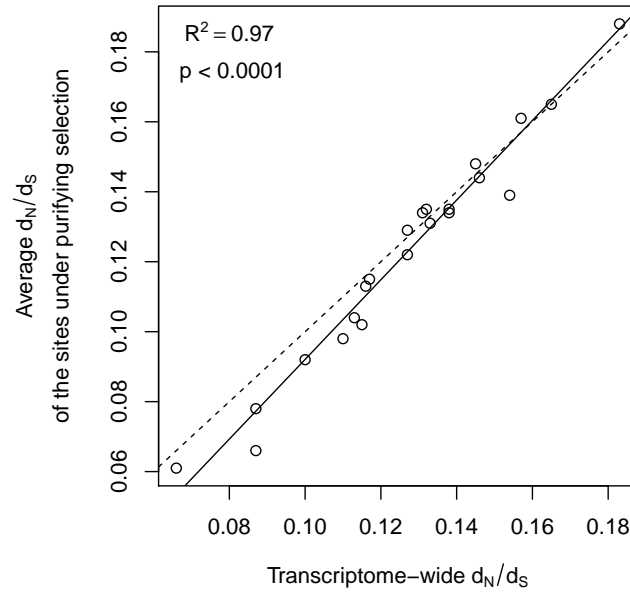

**Figure S3:** The transcriptome-wide  $d_N/d_S$  is a good estimate of the average  $d_N/d_S$  of the sites under purifying selection ( $w^-$ ). Dash line indicates  $d_N/d_S = w^-$ , and the solid line indicates the linear regression. Transcriptome-wide  $d_N/d_S$  is therefore a good descriptor of the efficacy of purifying selection.

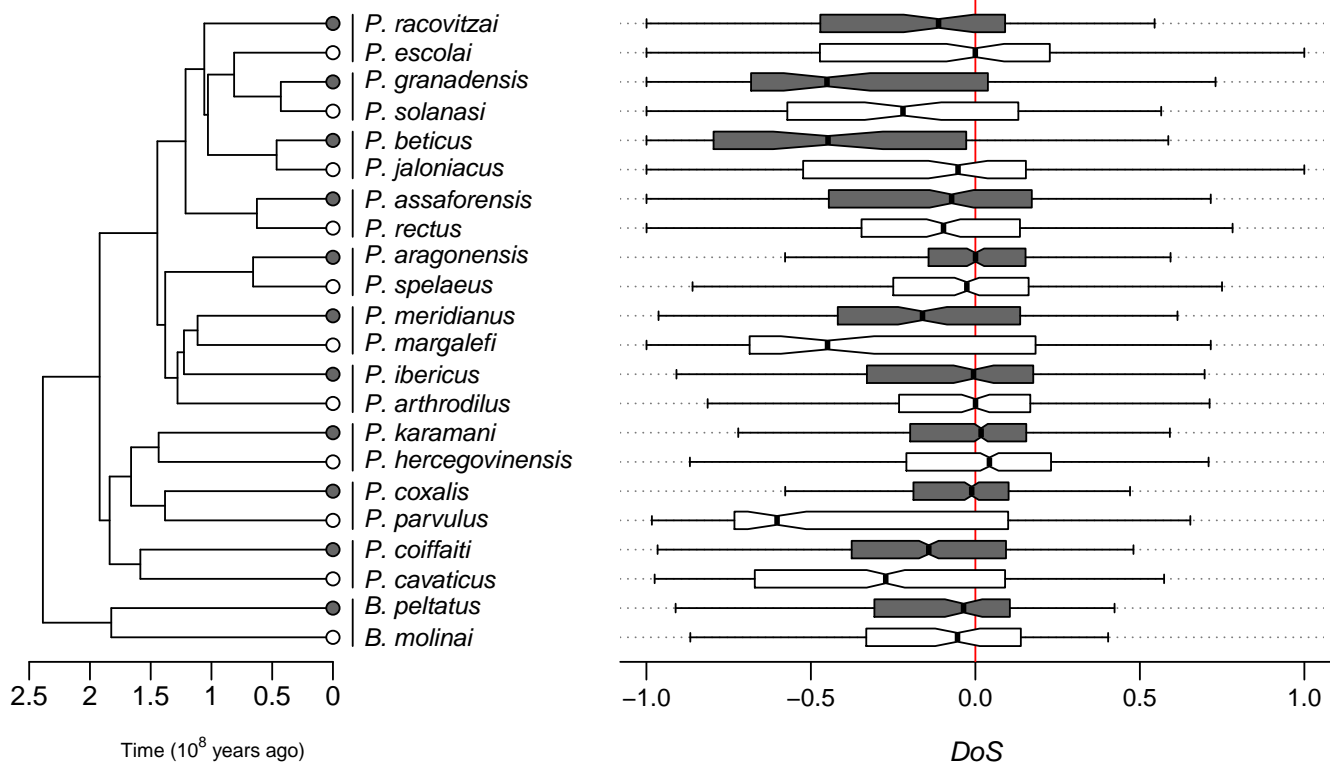

**Figure S4:** Distribution of the direction of selection (DoS) statistics. If positive selection was the dominant force driving  $d_N/d_S$  increase in subterranean species,  $DoS$  should increase in subterranean species (dark dots and boxes).

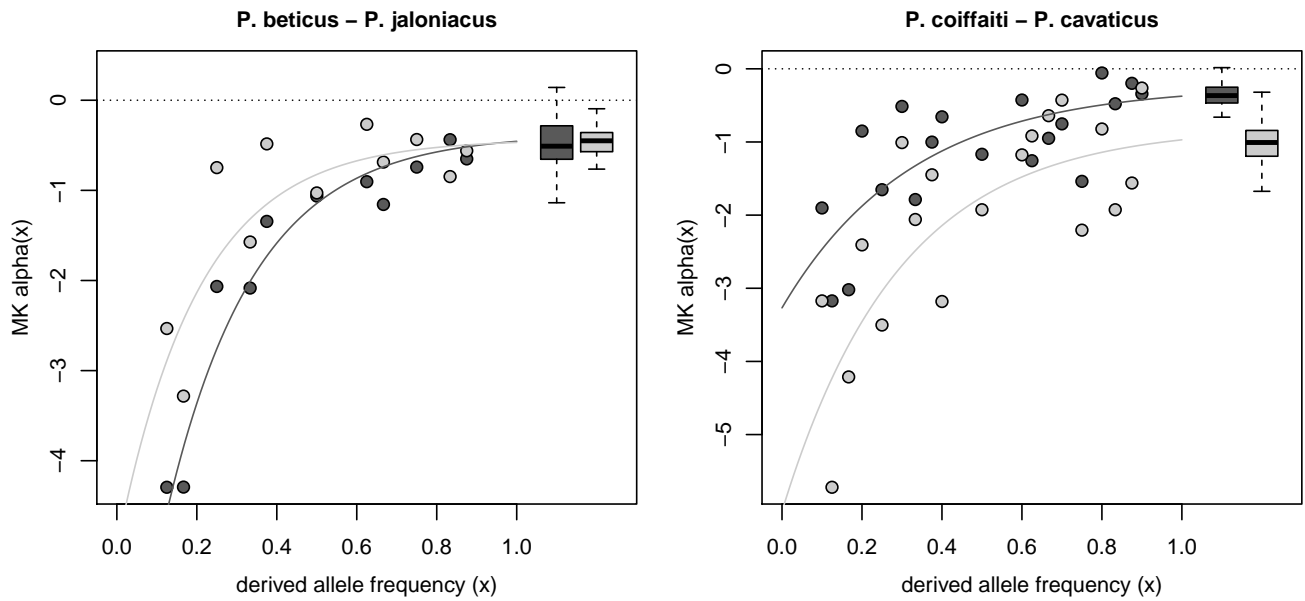

**Figure S5:** Estimation of the McDonald-Kreitman rate of adaptation ( $\alpha$ ) as a function of the derived allele frequency for 2 pairs of surface (dark gray) and subterranean (light gray) species. The curves represent the fitted function  $\alpha(x) = a + be^{-cx}$ . The boxplots represent the distribution of the asymptotic  $\alpha(1)$  using 100 bootstrap pseudo-replicates of the SNPs used to reconstruct the unfolded SFS.

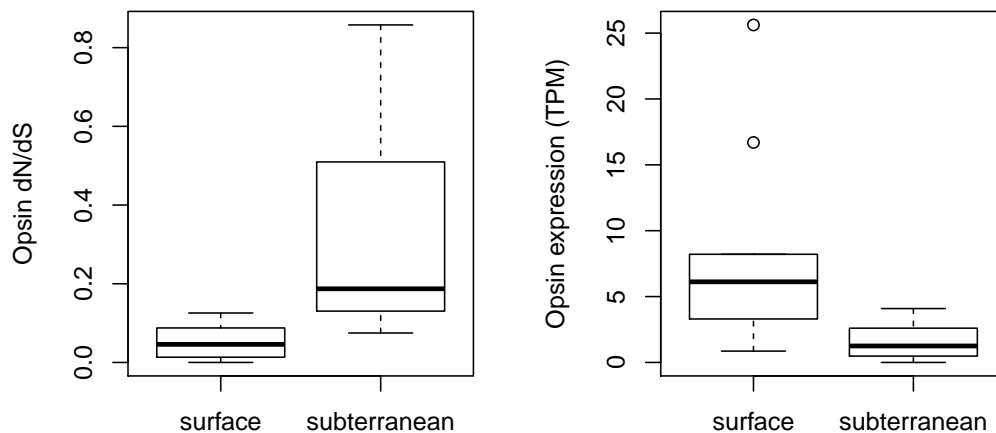

**Figure S6:** Opsin  $d_N/d_S$  and expression as measured in the surface and subterranean species. Expression is measured as transcript per million (TPM).

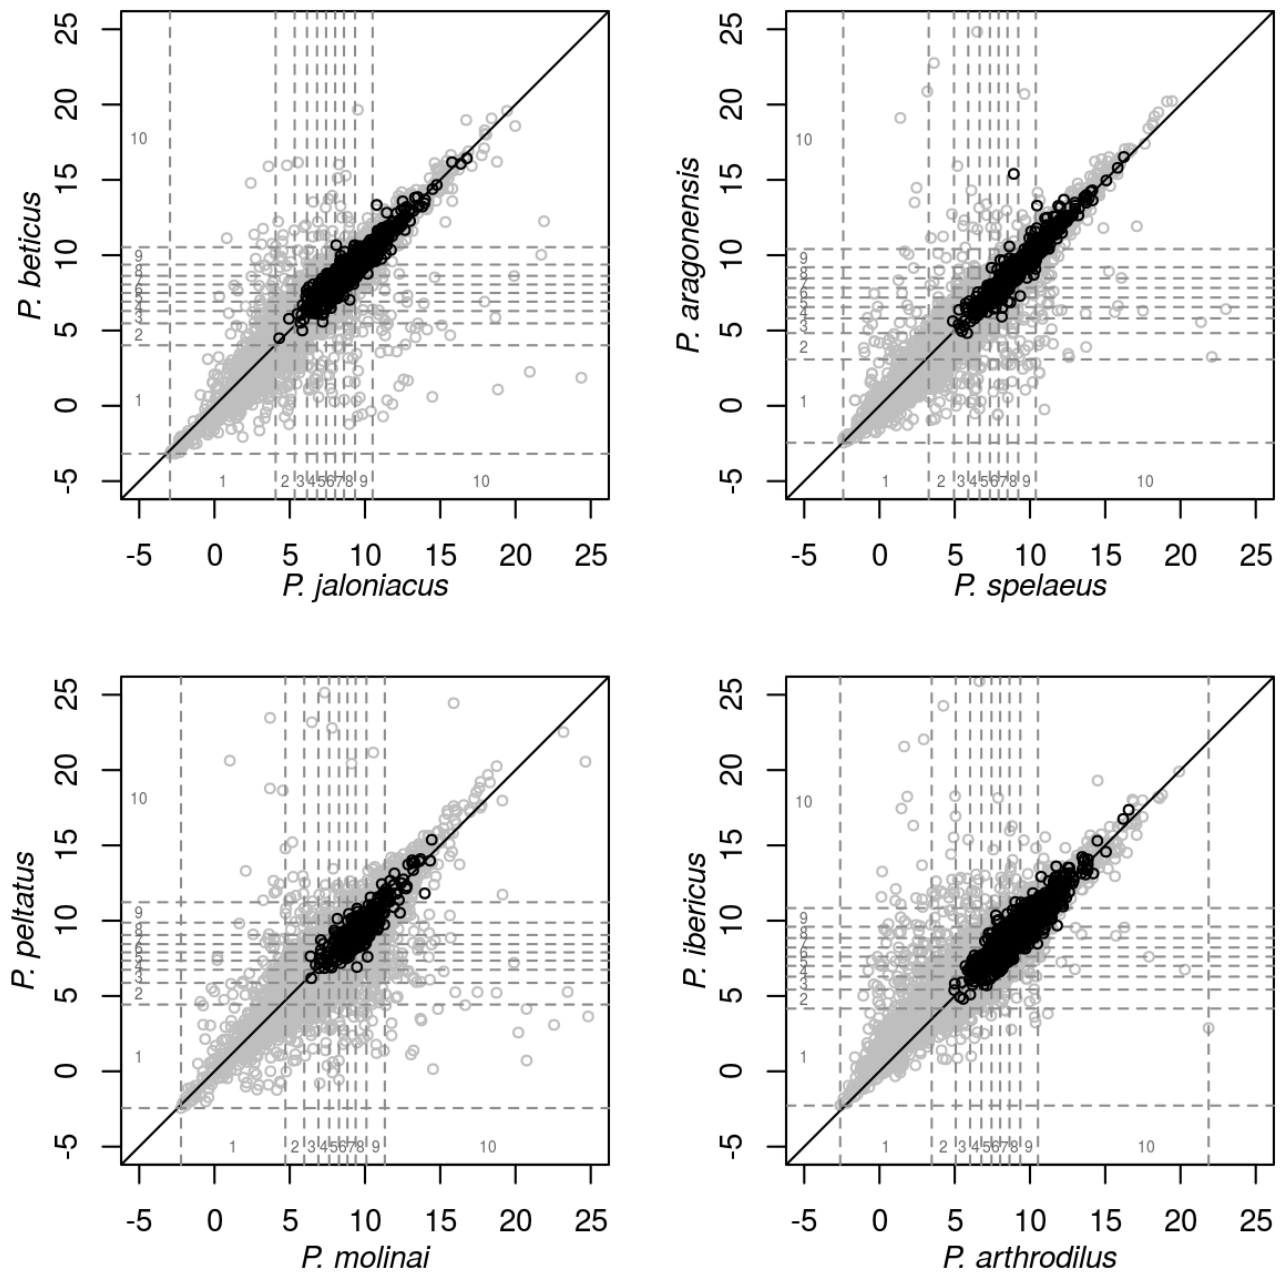

**Figure S7:** Comparisons of transcriptome-wide gene expression between 2 species of the same pair (Y=surface, X=subterranean). The expressions are normalized log2 read counts. All the genes present in both species are displayed in grey, while the set of conserved single copy genes used to compute  $d_N/d_S$  are in black. Ten different expression classes are delimited using dotted grey lines.

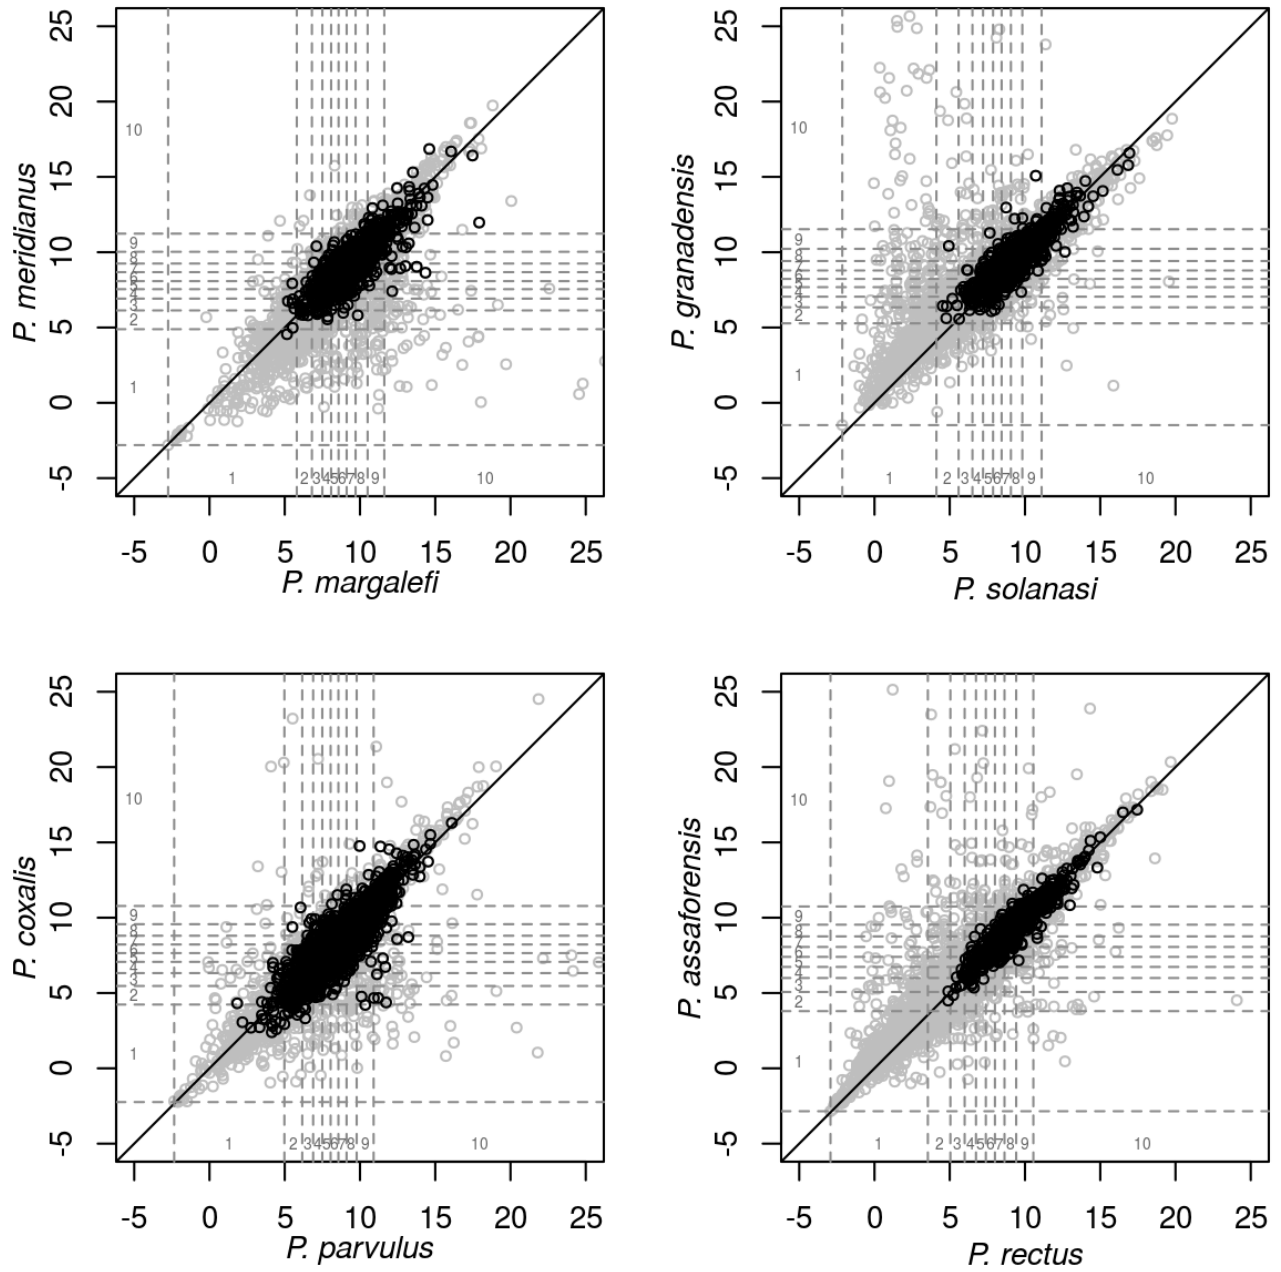

Figure S7: Continued.



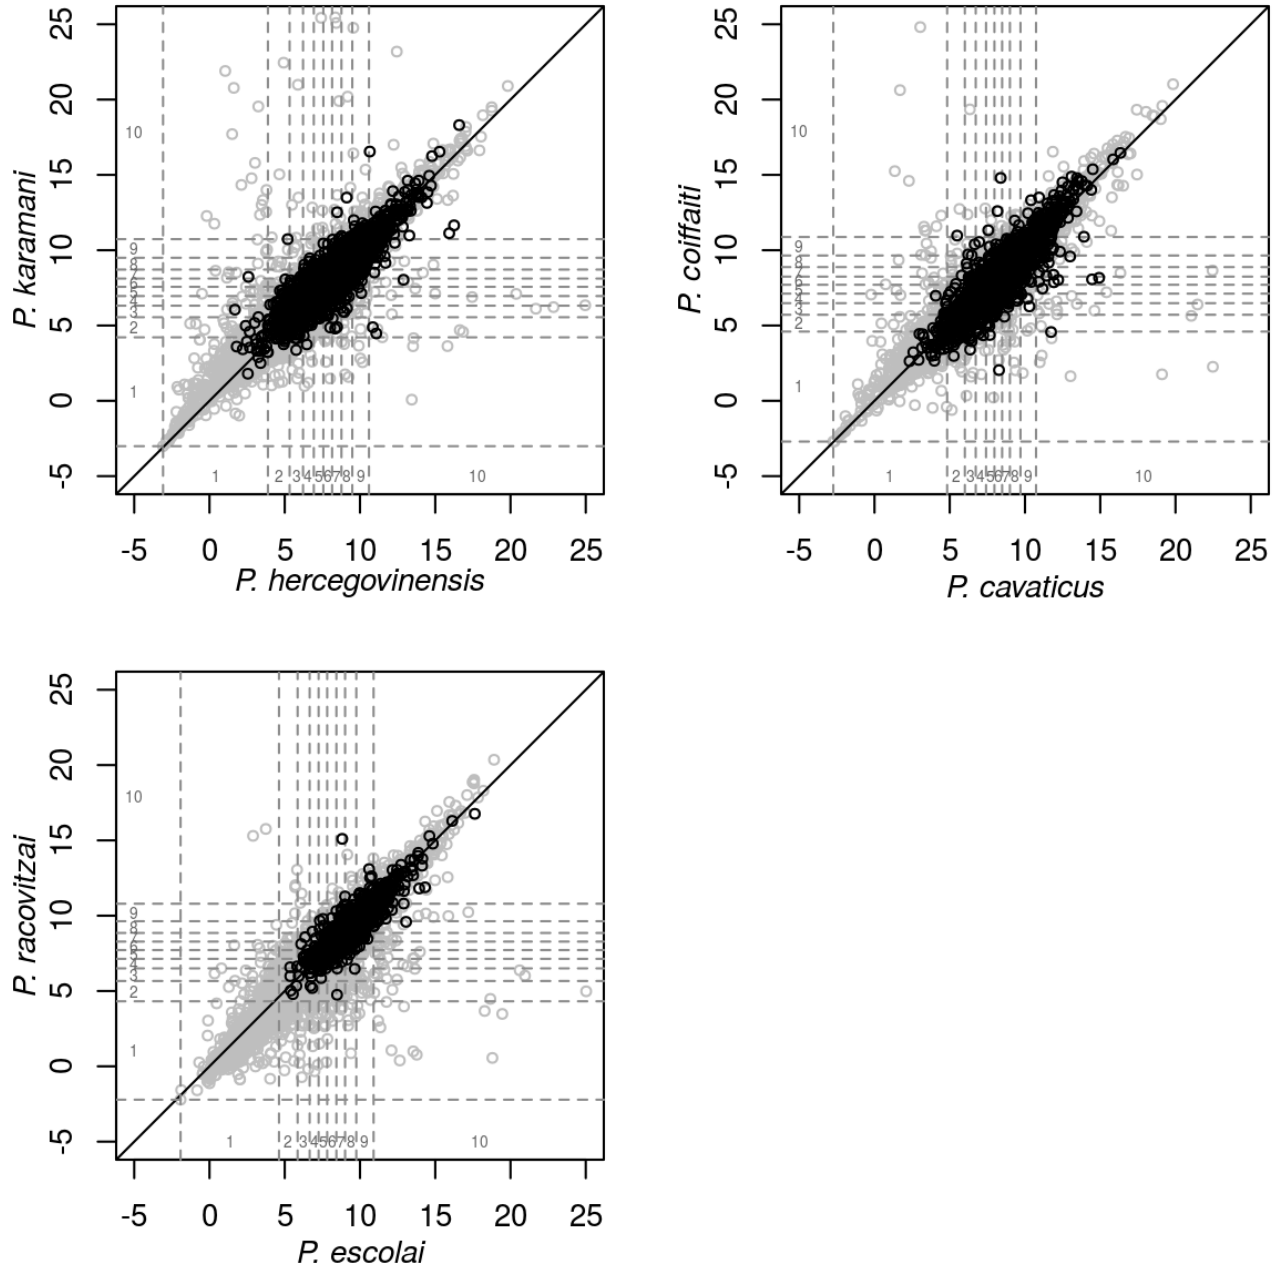

Figure S7: Continued.

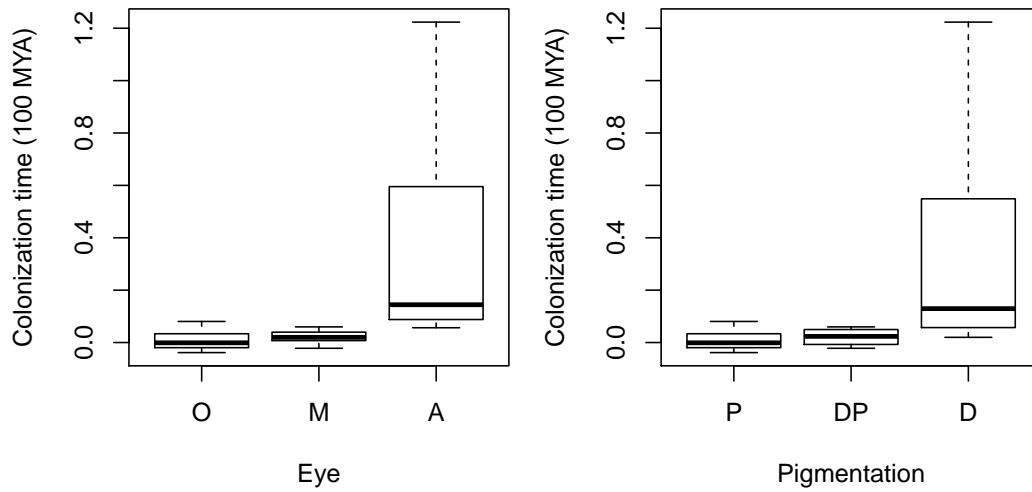

**Figure S8:** Covariation between eye or pigmentation phenotypes and estimated colonization times. O: oculated, M: microphthalmous, A: anophthalmous, P: pigmented, DP: partially depigmented, D: depigmented. In some pigmented or oculated species, colonization times are greater than 0, probably as a result of the uncertainty in the  $d_N/d_S$  measurement.

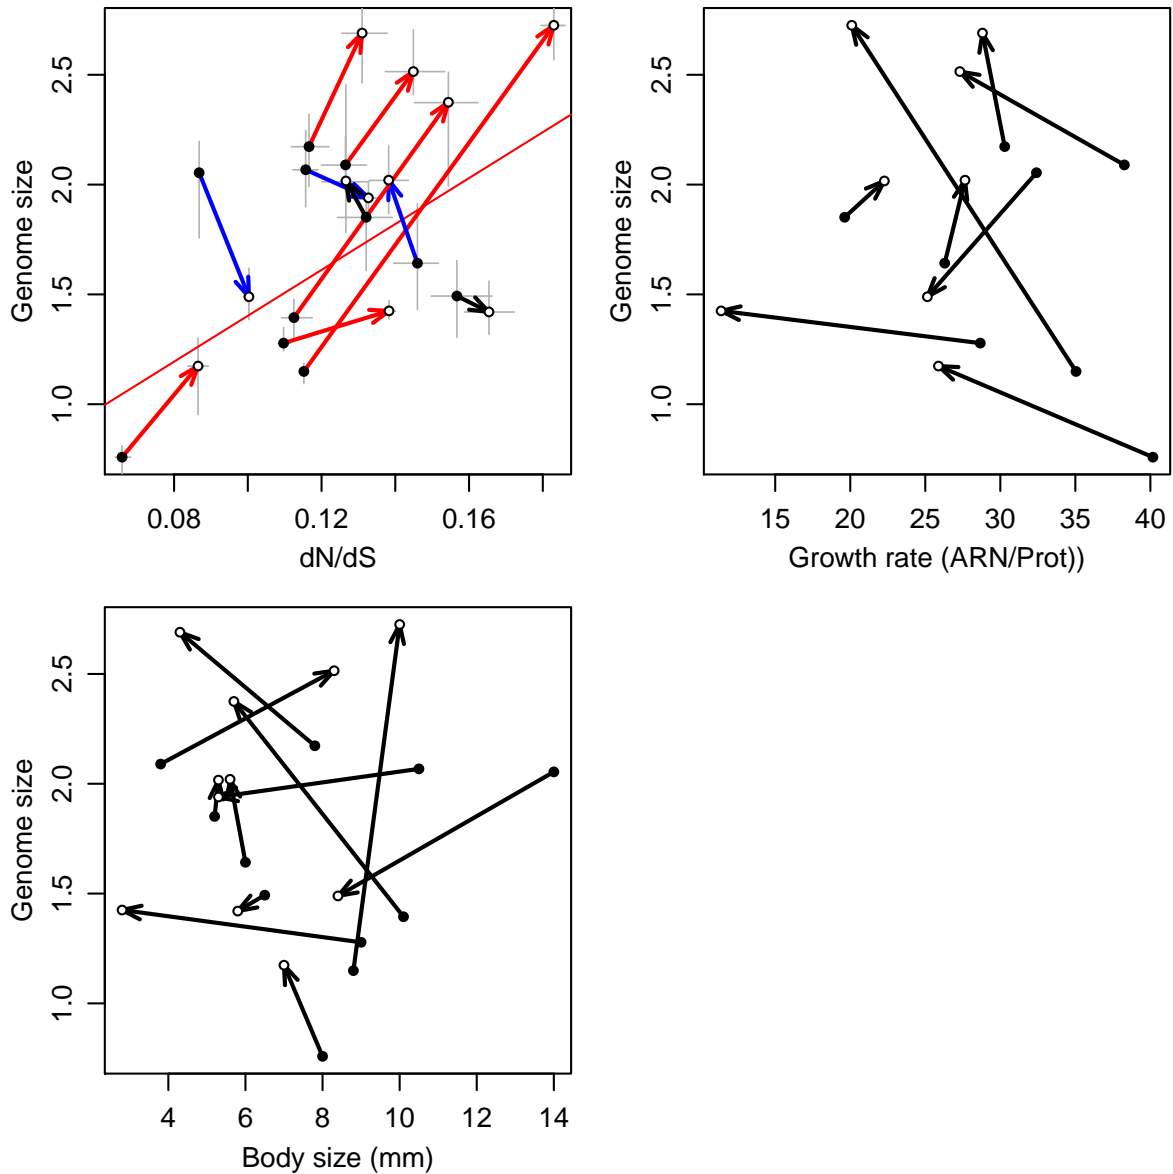

**Figure S9:** Relationship between genome size and selection efficacy (transcriptome-wide  $d_N/d_S$ , top left), growth rate (top right) or body size (bottom left). Variations from the surface (black circle) to the subterranean species (white circle) of a pair are displayed using arrows. For the genome size versus  $d_N/d_S$  plot, color of the arrows indicates the congruence with the MH expectation (red), a different pattern (blue) or no pattern (black). The line indicates the relationship supported by a PGLS model.

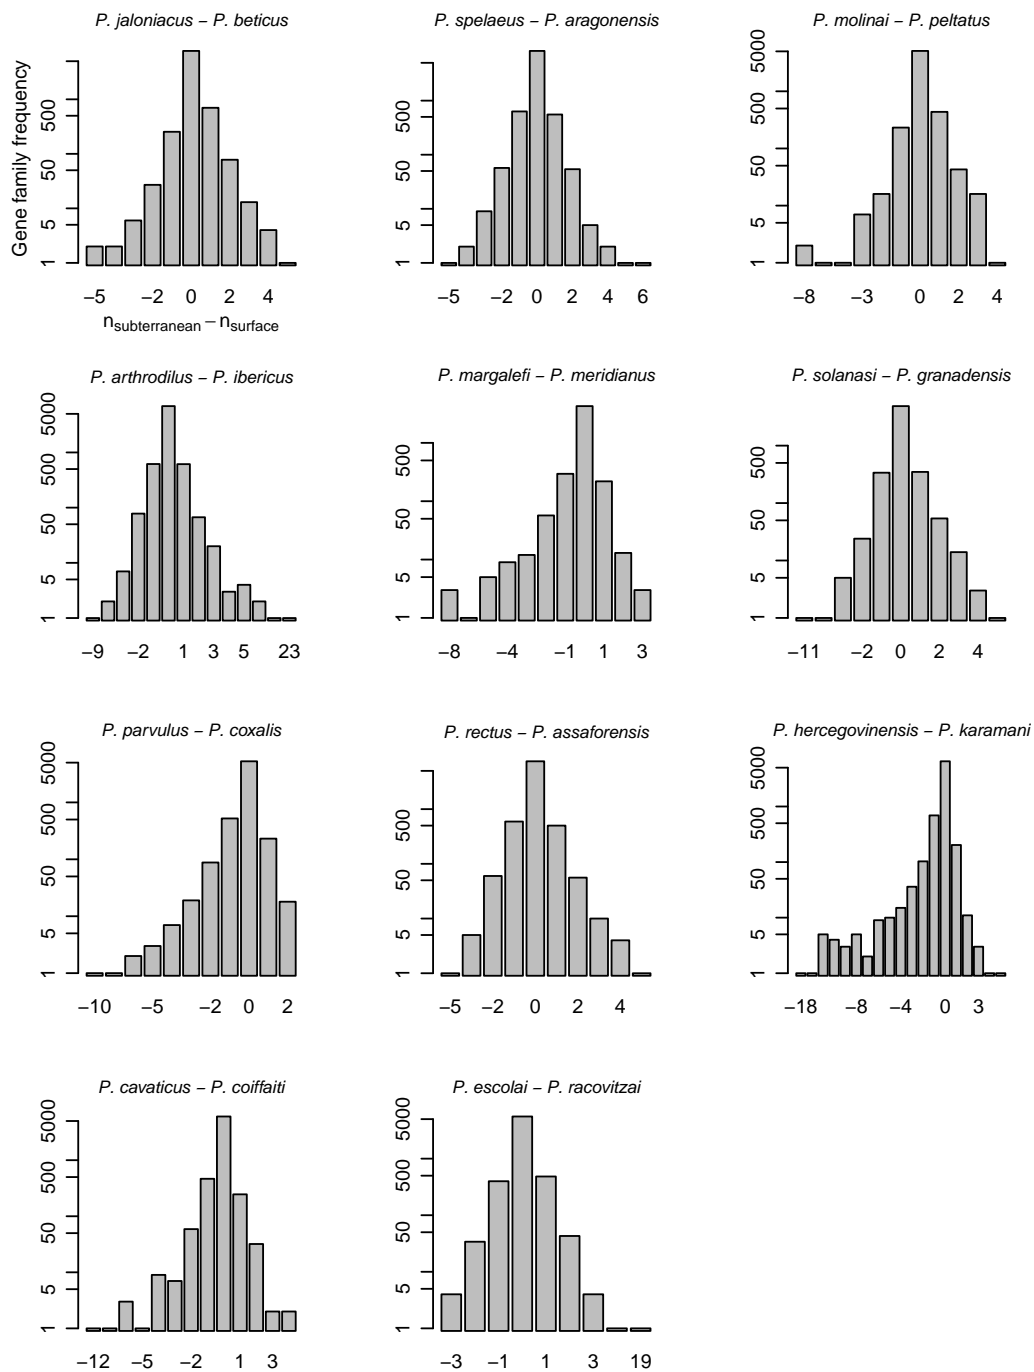

**Figure S10:** Testing the influence of large duplication events using the difference in the number of gene copy between the subterranean and surface species of a pair ( $n_{subterranean} - n_{surface}$ ). In the event of a large duplication in the subterranean species, the whole distribution will be shifted toward positive values, which is not the case in any pairs.

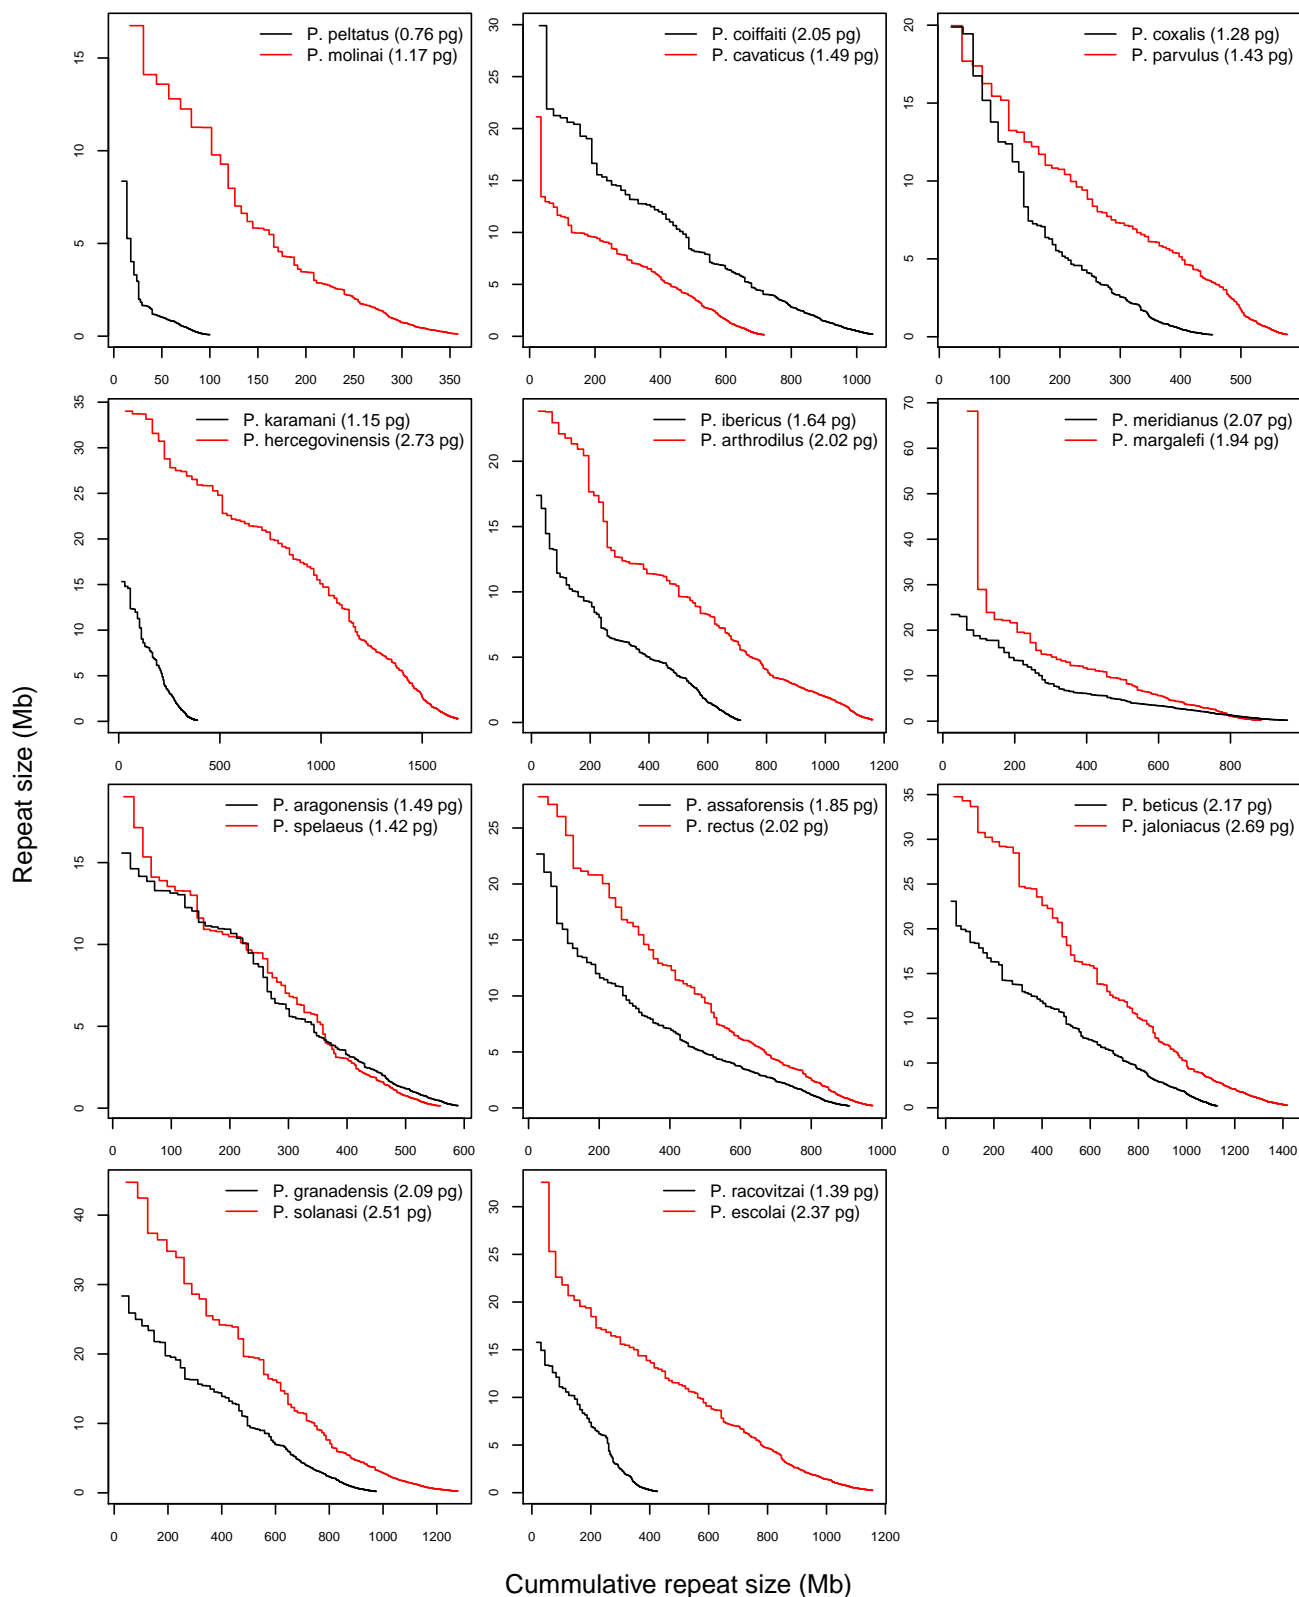

**Figure S11:** Repeatome size estimates using low coverage genome sequencing (0.05X) for 11 independent pairs of surface (black line) and subterranean (red line) species. Reads from highly repeated regions are sampled, clustered and assembled into elements, the size of which is estimated in megabases (Y-axis). These elements are ranked according to their decreasing contribution to genome size along the X-axis and their cumulated contributions provide an estimate of the repeatome size.

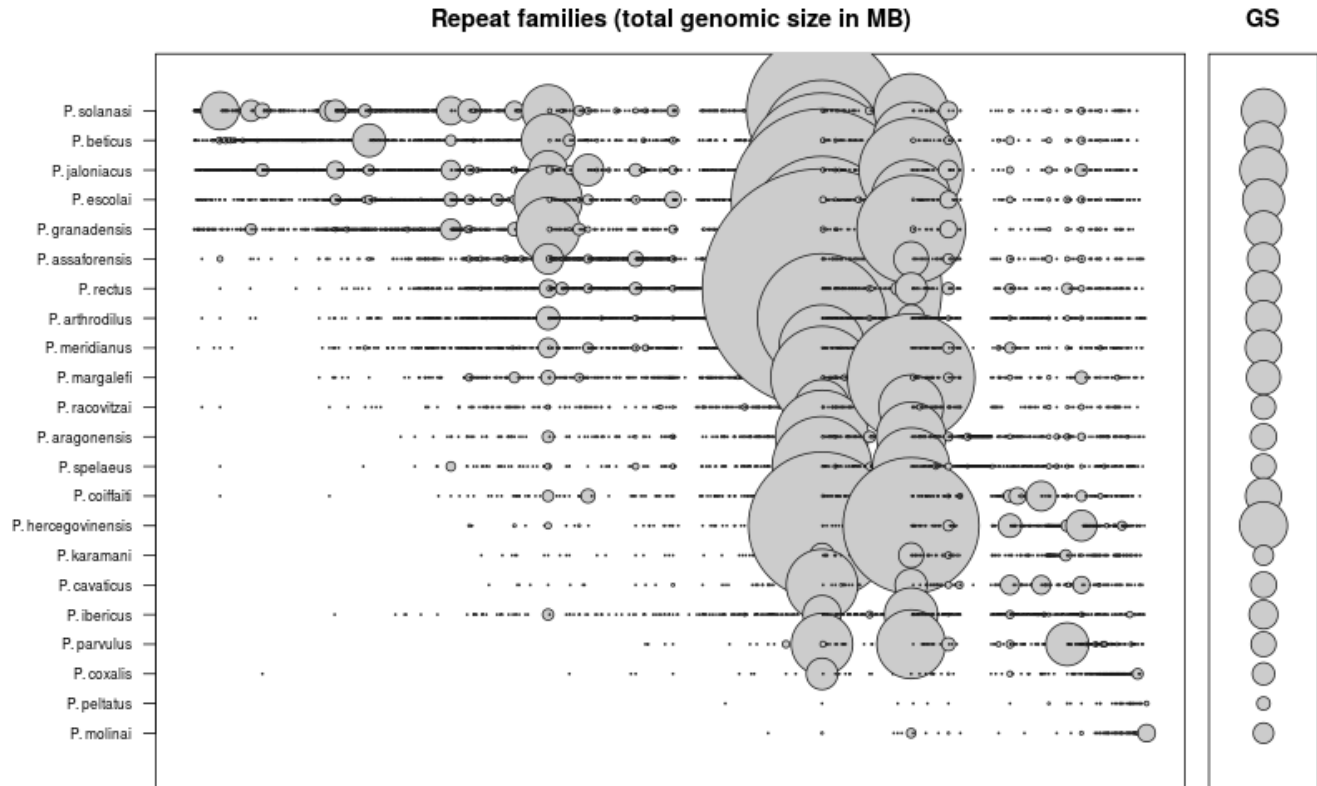

**Figure S12:** Repeated element frequencies in the 22 species. The table rows and columns were reordered following the first axis of a correspondance analysis. Circle areas are proportional to the total genome size of a given repeat family (min=0.01 and max=408.7 Mb). Orphan repeats were removed from the analysis. Genome sizes are represented on the right panel (min=0.76 and max=2.73 pg). On the first axis of the correspondance analysis, species are ordered following their phylogenetic proximity and not following their genome sizes.

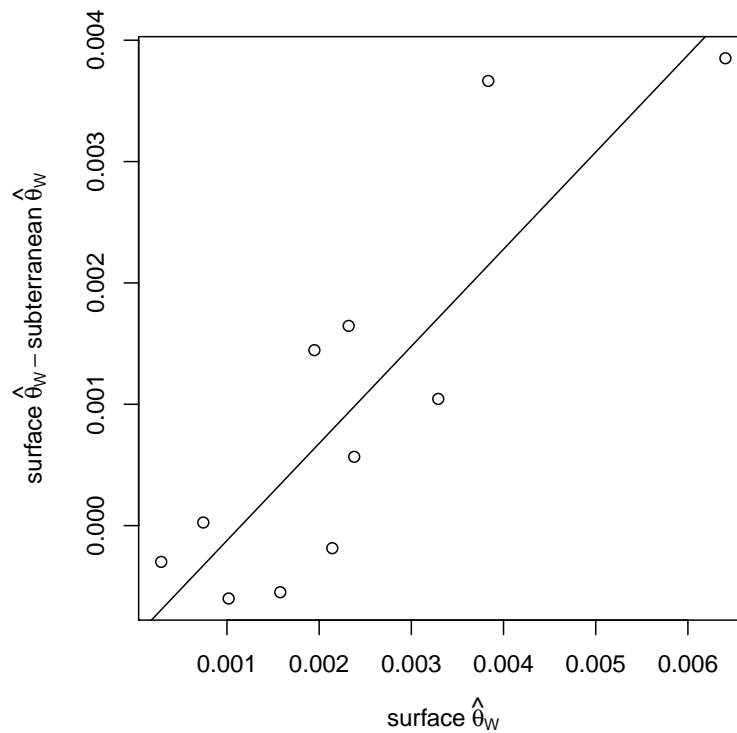

**Figure S13:** Differences in polymorphism between the surface and subterranean species of a pair as a function of polymorphism in the surface species. This relationship suggests that our capacity to detect changes in polymorphism subsequent to the ecological transition is strongly dependent on the polymorphism of the surface species. The line represents the linear regression with  $R^2 = 0.74$ ,  $\beta = 0.8$  and p-value = 0.0007.





**Table S1:** Description of the 11 Aselloidea species pairs. Clade names are either Ibero-aquitainian (I), coxalis (C) or Alpine (A); ES: Ecological status (Subt: subterranean; Surf: surface); EE: evolutionary unit number as defined in Morvan *et al* 2013 *Syst. Biol.*; “pool” indicates the number of individual RNA extractions that were pooled prior to sequencing; GS: haploid genome size in picograms. Size: body size in mm. Growth rate are estimated using RNA (in ng) over protein (in  $\mu$ g) ratios. Taxa are listed in the same order as in figure 1 of the manuscript.

| Species                                     | clade | locality          | ES   | pair | EE    | pool | GS    | $d_N/d_S$ | $p_N/p_S$ | $\theta_w$ | size  | growth rate |
|---------------------------------------------|-------|-------------------|------|------|-------|------|-------|-----------|-----------|------------|-------|-------------|
| <i>P. racovitzai</i> Henry & Magniez, 1972  | I     | Arbas             | Surf | 1    | T_110 | 6    | 1.394 | 0.1125    | 0.17299   | 1.02       | 10.10 |             |
| <i>P. escolai</i> Henry & Magniez, 1982     | I     | Salar             | Subt |      | T_116 | 6    | 2.373 | 0.1544    | 0.18589   | 1.62       | 5.70  |             |
| <i>P. granadensis</i> Henry & Magniez, 2003 | I     | Alhama de Granada | Surf | 2    | T_113 | 6    | 2.089 | 0.1265    | 0.33170   | 0.74       | 3.80  | 38.26       |
| <i>P. solanasi</i> Henry & Magniez, 1972    | I     | Benajouan         | Subt |      | CD_15 | 6    | 2.514 | 0.1449    | 0.32158   | 0.72       | 8.30  | 27.30       |
| <i>P. beticus</i> Henry & Magniez, 1992     | I     | Vallada           | Surf | 3    | T_107 | 5    | 2.172 | 0.1166    | 0.33583   | 0.29       | 7.80  | 30.29       |
| <i>P. jaloniacus</i> Henry & Magniez, 1978  | I     | Benichembla       | Subt |      | T_108 | 7    | 2.689 | 0.1310    | 0.29317   | 0.59       | 4.30  | 28.81       |
| <i>P. assoforensis</i> Afonso, 1988         | I     | Assofora          | Surf | 4    | T_128 | 6    | 1.851 | 0.1321    | 0.21611   | 1.58       | 5.20  | 19.63       |
| <i>P. rectus</i> Afonso, 1982               | I     | Evora             | Subt |      | T_130 | 6    | 2.013 | 0.1266    | 0.20264   | 2.13       | 5.30  | 22.27       |
| <i>P. aragonensis</i> Henry & Magniez, 1992 | I     | Burgui            | Surf | 5    | T_147 | 5    | 1.492 | 0.1567    | 0.17180   | 6.41       | 6.50  |             |
| <i>P. spelaicus</i> (Racovitz, 1922)        | I     | Ancille           | Subt |      | T_142 | 20   | 1.420 | 0.1654    | 0.18811   | 2.56       | 5.80  |             |
| <i>P. meridiamus</i> (Racovitz, 1919)       | I     | Alfoz de Lloredo  | Surf | 6    | T_153 | 6    | 2.067 | 0.1157    | 0.22323   | 1.95       | 10.50 |             |
| <i>P. margalefi</i> Henry & Magniez, 1982   | I     | Gestalgar         | Subt |      | T_119 | 6    | 1.939 | 0.1327    | 0.44294   | 0.50       | 5.30  |             |
| <i>P. ibericus</i> (Braga, 1946)            | I     | Barrio            | Surf | 7    | T_118 | 6    | 1.642 | 0.1460    | 0.18575   | 2.14       | 6.00  | 26.30       |
| <i>P. arthrodilus</i> (Braga, 1945)         | I     | Legacao           | Subt |      | T_150 | 6    | 2.019 | 0.1382    | 0.19252   | 2.33       | 5.60  | 27.65       |
| <i>P. karamani</i> (Remy, 1934)             | C     | Kljuc             | Surf | 8    | T_038 | 6    | 1.149 | 0.1152    | 0.14367   | 3.29       | 8.80  | 35.05       |
| <i>P. hercegovinensis</i> (Karaman, 1933)   | C     | Zavala            | Subt |      | T_051 | 6    | 2.725 | 0.1830    | 0.18662   | 2.25       | 10.00 | 20.10       |
| <i>P. coxalis</i> (Dolfus, 1892)            | C     | La Indiana        | Surf | 9    | T_047 | 6    | 1.278 | 0.1097    | 0.12052   | 3.83       | 9.00  | 28.66       |
| <i>P. parvulus</i> (Sket, 1960)             | C     | Crnoemelj         | Subt |      | T_048 | 6    | 1.424 | 0.1383    | 0.45718   | 0.17       | 2.80  | 11.40       |
| <i>P. coffaiti</i> (Henry & Magniez, 1972)  | A     | Caumelle          | Surf | 10   | T_044 | 6    | 2.053 | 0.0808    | 0.19055   | 2.32       | 14.00 | 32.41       |
| <i>P. cavaticus</i> (Leydig, 1871)          | A     | Thoiria           | Subt |      | T_080 | 6    | 1.489 | 0.1003    | 0.30971   | 0.67       | 8.40  | 25.14       |
| <i>B. peltatus</i> (Braga, 1944)            |       | Lousada           | Surf | 11   | T_171 | 6    | 0.759 | 0.0659    | 0.12437   | 2.38       | 8.00  | 40.17       |
| <i>B. molinaei</i> Henry & Magniez, 1988    |       | Vegacervera       | Subt |      | T_163 | 8    | 1.173 | 0.0865    | 0.18006   | 1.81       | 7.00  | 25.88       |

**Table S2:** Estimates of the transcriptome-wide  $d_N/d_S$  using a branch model ( $w$ ) and using a branch-site model that allows  $d_N/d_S$  variations across sites. Branch-site model allows to distinguish variation in the intensity of purifying ( $w^-$ ) and positive selection ( $w^+$ ) as well as their respective frequencies ( $f_q(w^-)$ , with  $f_q(w^+) = 1 - f_q(w^-)$ ). Nsites: number of codons analysed; PS: number of sites under positive selection; test: Wilcoxon test of an increase of  $w^-$  in subterranean species; \*\*\*: p-value < 0.0001; ●: surface; ○: subterranean.

| Species                     | Branch |        |        | Nsites | Branch-site |       |            | PS | test |
|-----------------------------|--------|--------|--------|--------|-------------|-------|------------|----|------|
|                             | $w$    | $d_S$  | $d_N$  |        | $w^-$       | $w^+$ | $f_q(w^-)$ |    |      |
| ● <i>P. beticus</i>         | 0.117  | 0.0367 | 0.0043 | 266777 | 0.115       | 1.752 | 0.991      | 15 | ***  |
| ○ <i>P. jaloniacus</i>      | 0.131  | 0.0300 | 0.0039 |        | 0.134       | 1.509 | 0.992      | 1  |      |
| ● <i>P. racovitzai</i>      | 0.113  | 0.0689 | 0.0078 | 208775 | 0.104       | 1.164 | 0.996      | 3  | ***  |
| ○ <i>P. escolai</i>         | 0.154  | 0.0208 | 0.0032 |        | 0.139       | 2.474 | 0.993      | 10 |      |
| ● <i>P. aragonensis</i>     | 0.157  | 0.0214 | 0.0034 | 267427 | 0.161       | 2.104 | 0.992      | 2  | ***  |
| ○ <i>P. spelaeus</i>        | 0.165  | 0.0264 | 0.0044 |        | 0.165       | 2.109 | 0.990      | 10 |      |
| ● <i>P. ibericus</i>        | 0.146  | 0.0569 | 0.0083 | 268326 | 0.144       | 1.375 | 0.987      | 15 |      |
| ○ <i>P. arthrodilus</i>     | 0.138  | 0.0434 | 0.0060 |        | 0.134       | 1.264 | 0.991      | 7  |      |
| ● <i>P. meridianus</i>      | 0.116  | 0.0880 | 0.0102 | 219632 | 0.113       | 1.328 | 0.987      | 15 | ***  |
| ○ <i>P. margalefi</i>       | 0.133  | 0.0766 | 0.0102 |        | 0.131       | 1.500 | 0.983      | 38 |      |
| ● <i>P. granadensis</i>     | 0.127  | 0.0328 | 0.0042 | 209695 | 0.122       | 3.950 | 0.990      | 35 | ***  |
| ○ <i>P. solanasi</i>        | 0.145  | 0.0199 | 0.0029 |        | 0.148       | 2.601 | 0.993      | 6  |      |
| ● <i>P. assaforensis</i>    | 0.132  | 0.0257 | 0.0034 | 263740 | 0.135       | 1.528 | 0.993      | 6  |      |
| ○ <i>P. rectus</i>          | 0.127  | 0.0276 | 0.0035 |        | 0.129       | 2.029 | 0.992      | 6  |      |
| ● <i>P. coiffaiti</i>       | 0.087  | 0.2485 | 0.0216 | 231949 | 0.078       | 2.659 | 0.994      | 17 | ***  |
| ○ <i>P. cavaticus</i>       | 0.100  | 0.1889 | 0.0190 |        | 0.092       | 1.523 | 0.991      | 15 |      |
| ● <i>P. coxalis</i>         | 0.110  | 0.1493 | 0.0164 | 215844 | 0.098       | 1.316 | 0.988      | 17 | ***  |
| ○ <i>P. parvulus</i>        | 0.138  | 0.1420 | 0.0196 |        | 0.135       | 1.279 | 0.986      | 17 |      |
| ● <i>P. karamani</i>        | 0.115  | 0.1693 | 0.0195 | 231634 | 0.102       | 1.359 | 0.987      | 31 | ***  |
| ○ <i>P. hercegovinensis</i> | 0.183  | 0.0630 | 0.0115 |        | 0.188       | 1.401 | 0.981      | 11 |      |
| ● <i>B. peltatus</i>        | 0.066  | 0.5352 | 0.0353 | 122043 | 0.061       | 1.580 | 0.991      | 4  | ***  |
| ○ <i>B. molinai</i>         | 0.087  | 0.3746 | 0.0324 |        | 0.066       | 1.752 | 0.992      | 3  |      |

**Table S3:** Transcriptome single nucleotide polymorphism (SNP) found in the 11 species pairs. EE: evolutionary unit, ES: Ecological status (Subt: subterranean; Surf: surface), Ngene: number of genes considered for the polymorphism scan, SNPs: synonymous SNP, SNPn: non-synonymous SNP, S: number of synonymous sites, N: number of non-synonymous sites.

| Species                   | EE    | couple | ES   | ngene | SNPs | SNPn | S      | N      |
|---------------------------|-------|--------|------|-------|------|------|--------|--------|
| <i>P. racovitzai</i>      | T_110 | 1      | Surf | 230   | 220  | 133  | 84650  | 289542 |
| <i>P. escolai</i>         | T_116 |        | Subt |       | 326  | 204  | 73247  | 251395 |
| <i>P. granadensis</i>     | T_113 | 2      | Surf | 122   | 66   | 73   | 35132  | 122368 |
| <i>P. solanasi</i>        | CD_15 |        | Subt |       | 82   | 86   | 46024  | 158768 |
| <i>P. beticus</i>         | T_107 | 3      | Surf | 690   | 183  | 197  | 274737 | 936867 |
| <i>P. jaloniacus</i>      | T_108 |        | Subt |       | 404  | 398  | 271383 | 925563 |
| <i>P. assaforensis</i>    | T_128 | 4      | Surf | 676   | 905  | 657  | 233431 | 806015 |
| <i>P. rectus</i>          | T_130 |        | Subt |       | 1216 | 832  | 233519 | 806029 |
| <i>P. aragonensis</i>     | T_147 | 5      | Surf | 755   | 4110 | 2363 | 282681 | 967329 |
| <i>P. spelaeus</i>        | T_142 |        | Subt |       | 2514 | 1604 | 281863 | 965579 |
| <i>P. meridianus</i>      | T_153 | 6      | Surf | 325   | 608  | 470  | 124523 | 430339 |
| <i>P. margalefi</i>       | T_119 |        | Subt |       | 120  | 181  | 95152  | 330518 |
| <i>P. ibericus</i>        | T_118 | 7      | Surf | 351   | 561  | 360  | 109795 | 377042 |
| <i>P. arthrodilus</i>     | T_150 |        | Subt |       | 733  | 474  | 126774 | 434094 |
| <i>P. karamani</i>        | T_038 | 8      | Surf | 569   | 1825 | 906  | 224945 | 771616 |
| <i>P. hercegovinensis</i> | T_051 |        | Subt |       | 1275 | 801  | 226679 | 777352 |
| <i>P. coxalis</i>         | T_047 | 9      | Surf | 345   | 1111 | 451  | 117465 | 403065 |
| <i>P. parvulus</i>        | T_048 |        | Subt |       | 48   | 74   | 113745 | 390888 |
| <i>P. coiffaiti</i>       | T_044 | 10     | Surf | 685   | 1446 | 952  | 254802 | 872511 |
| <i>P. cavaticus</i>       | T_080 |        | Subt |       | 413  | 422  | 254630 | 872530 |
| <i>B. peltatus</i>        | T_171 | 11     | Surf | 375   | 805  | 320  | 133476 | 451473 |
| <i>B. molinai</i>         | T_163 |        | Subt |       | 627  | 377  | 125153 | 425536 |

**Table S4:** Number of genes that were found in a higher, lower or identical expression class in the surface (surf) species relative to the subterranean species (subt) within the set of conserved genes used in the  $d_N/d_S$  analysis. 10 equal size expression classes were used.

| surf                   | subt                      | surf > subt | surf < subt | surf == subt |
|------------------------|---------------------------|-------------|-------------|--------------|
| <i>B. peltatus</i>     | <i>B. molinai</i>         | 103         | 97          | 120          |
| <i>P. coiffaiti</i>    | <i>P. cavaticus</i>       | 693         | 682         | 882          |
| <i>P. coxalis</i>      | <i>P. parvulus</i>        | 719         | 710         | 828          |
| <i>P. karamani</i>     | <i>P. hercegovinensis</i> | 678         | 738         | 841          |
| <i>P. ibericus</i>     | <i>P. arthrodilus</i>     | 273         | 280         | 310          |
| <i>P. meridianus</i>   | <i>P. margalefi</i>       | 317         | 291         | 255          |
| <i>P. aragonensis</i>  | <i>P. spelaeus</i>        | 183         | 198         | 482          |
| <i>P. assaforensis</i> | <i>P. rectus</i>          | 245         | 242         | 376          |
| <i>P. beticus</i>      | <i>P. jaloniacus</i>      | 213         | 225         | 425          |
| <i>P. granadensis</i>  | <i>P. solanasi</i>        | 261         | 301         | 301          |
| <i>P. racovitzai</i>   | <i>P. escolai</i>         | 288         | 269         | 306          |

**Table S5:** Opsin  $d_N/d_S$  and estimated colonization time (Col. time) in hundreds of million years. Colonization times are negative for few surface species, presumably as a result of small error in the opsin  $d_N/d_S$  estimation.

| Species                   | ES   | $d_N/d_S$ | Col. time |
|---------------------------|------|-----------|-----------|
| <i>P. cavaticus</i>       | Subt | 0.13      | 0.16      |
| <i>P. coiffaiti</i>       | Surf | 0.04      | 0.01      |
| <i>P. coxalis</i>         | Surf | 0.05      | 0.03      |
| <i>P. hercegovinensis</i> | Subt | 0.86      | 1.22      |
| <i>P. karamani</i>        | Surf | 0.09      | 0.08      |
| <i>P. arthrodilus</i>     | Subt | 0.52      | 0.64      |
| <i>P. ibericus</i>        | Surf | 0.02      | -0.02     |
| <i>P. margalefi</i>       | Subt | 0.51      | 0.55      |
| <i>P. meridianus</i>      | Surf | 0.00      | -0.04     |
| <i>P. spelaeus</i>        | Subt | 0.21      | 0.12      |
| <i>P. aragonensis</i>     | Surf | 0.09      | 0.04      |
| <i>P. rectus</i>          | Subt | 0.12      | 0.06      |
| <i>P. assaforensis</i>    | Surf | 0.13      | 0.06      |
| <i>P. jaloniacus</i>      | Subt | 0.07      | 0.02      |
| <i>P. beticus</i>         | Surf | 0.00      | -0.02     |
| <i>P. solanasi</i>        | Subt | 0.16      | 0.06      |
| <i>P. granadensis</i>     | Surf | 0.05      | 0.01      |
| <i>P. escolai</i>         | Subt | 0.19      | 0.13      |
| <i>P. racovitzai</i>      | Surf | 0.01      | -0.02     |

**Table S6:** Genome sizes for 47 species of Metazoa (related to Figure 2). CO: iso country codes, LA: latitude in decimal degrees, LO: longitude in decimal degrees, EE: evolutionary unit number as defined in Morvan *et al* 2013 *Syst. Biol.*, GS: average haploid genome size in picograms, SD: GS standard deviation, ES: Ecological status (Subt: subterranean; Surf: surface). Taxa are listed in the same order than in fig. 2.

| Species                                             | Locality          | CO | LA       | LO       | EE    | GS    | SD    | ES   | Pair |
|-----------------------------------------------------|-------------------|----|----------|----------|-------|-------|-------|------|------|
| <i>Proasellus racovitzaei</i> Henry & Magniez, 1972 | Arbas             | FR | 42.97306 | 0.89889  | T_110 | 1.394 | 0.066 | Surf | 1    |
| <i>Proasellus escolai</i> Henry & Magniez, 1982     | Deifontes         | ES | 37.32921 | -3.5874  | T_116 | 2.375 | 0.214 | Subt |      |
| <i>Proasellus bellesi</i> Henry & Magniez, 1982     | El Burgo          | ES | 36.78994 | -4.94127 | T_115 | 3.163 | 0.330 | Subt |      |
| <i>Proasellus escolai</i> Henry & Magniez, 1982     | Salar             | ES | 37.14075 | -4.06587 | T_114 | 2.709 | 0.333 | Subt |      |
| <i>Proasellus granadensis</i> Henry & Magniez, 2003 | Alhama de Granada | ES | 37.04646 | -4.06266 | T_113 | 2.090 | 0.108 | Surf | 2    |
| <i>Proasellus solanasi</i> Henry & Magniez, 1972    | Benajoan          | ES | 36.73001 | -5.23871 | CD_15 | 2.515 | 0.116 | Subt |      |
| <i>Proasellus lagari</i> Henry & Magniez, 1982      | Sorbas            | ES | 37.0792  | -2.1008  | T_125 | 2.821 | 0.168 | Subt |      |
| <i>Proasellus beticus</i> Henry & Magniez, 1992     | Vallada           | ES | 38.88048 | -0.68871 | T_107 | 2.173 | 0.118 | Surf |      |
| <i>Proasellus jaloniacus</i> Henry & Magniez, 1978  | Benicheмба        | ES | 38.75669 | -0.10486 | T_108 | 2.690 | 0.286 | Subt | 3    |
| <i>Proasellus n. sp.</i> (Alviela)                  | Alcacena          | PT | 39.44561 | -8.71215 | T_127 | 1.985 | 0.196 | Subt |      |
| <i>Proasellus assaforensis</i> Afonso, 1988         | Asofora           | PT | 38.90872 | -9.42192 | T_128 | 1.851 | 0.139 | Surf | 4    |
| <i>Proasellus rectus</i> Afonso, 1982               | Evora             | PT | 38.60359 | -7.87318 | T_130 | 2.017 | 0.268 | Subt |      |
| <i>Proasellus ortizi</i> Henry & Magniez, 1992      | Ozana             | ES | 43.30385 | -3.57186 | T_092 | 1.450 | 0.109 | Surf | 5    |
| <i>Proasellus cantabricus</i> Henry & Magniez, 1968 | Mirones           | ES | 43.29376 | -3.69926 | T_094 | 1.712 | 0.270 | Subt |      |
| <i>Proasellus ebreensis</i> Henry & Magniez, 1992   | Cereceda          | ES | 42.80023 | -3.49401 | T_089 | 1.599 | 0.091 | Surf | 6    |
| <i>Proasellus grafi</i> Henry & Magniez, 2003       | Rasines           | ES | 43.29843 | -3.41971 | T_091 | 1.149 | 0.068 | Subt |      |
| <i>Proasellus aragonensis</i> Henry & Magniez, 1992 | Burgui            | ES | 42.70362 | -1.01646 | T_147 | 1.493 | 0.143 | Surf | 7    |
| <i>Proasellus spelaeus</i> (Racovitza, 1922)        | Ancille           | FR | 43.13806 | -1.20028 | T_142 | 1.420 | 0.093 | Subt |      |
| <i>Proasellus istrianus</i> (Stammer, 1932)         | Stepani           | SI | 45.55225 | 13.85515 | T_106 | 2.339 | 0.042 | Surf |      |
| <i>Proasellus meridiemus</i> (Racovitza, 1919)      | Padirac           | FR | 44.85809 | 1.75047  | T_151 | 2.106 | 0.080 | Surf |      |
| <i>Proasellus meridiemus</i> (Racovitza, 1919)      | Alfoz de Lloredo  | ES | 43.3492  | -4.18103 | T_153 | 2.068 | 0.124 | Surf | 8    |
| <i>Proasellus margalefi</i> Henry & Magniez, 1982   | Gestalgar         | ES | 39.5969  | -0.84903 | T_119 | 1.940 | 0.074 | Subt |      |
| <i>Proasellus margalefi</i> Henry & Magniez, 1982   | Albentosa         | ES | 40.12242 | -0.76379 | T_103 | 2.113 | 0.149 | Subt |      |
| <i>Proasellus ibericus</i> (Braga, 1946)            | Barrio            | PT | 41.84607 | -8.56764 | T_118 | 1.642 | 0.177 | Surf |      |
| <i>Proasellus arthrodilus</i> (Braga, 1945)         | Legacao           | PT | 40.03177 | -8.46979 | T_150 | 2.020 | 0.130 | Subt | 9    |
| <i>Proasellus karamani</i> (Remy, 1934)             | Kljuc             | BA | 43.0927  | 18.48516 | T_038 | 1.149 | 0.040 | Surf |      |
| <i>Proasellus hercegovinensis</i> (Karaman, 1933)   | Zavala            | BA | 42.84516 | 17.97832 | T_051 | 2.725 | 0.130 | Subt | 10   |

|                                                      |                            |    |          |           |        |       |       |      |
|------------------------------------------------------|----------------------------|----|----------|-----------|--------|-------|-------|------|
| <i>Proasellus anophthalmus</i> (Karaman, 1934)       | Dubrovnik                  | HR | 42.68907 | 18.07178  | CM_001 | 2.949 | 0.102 | Subt |
| <i>Proasellus coxalis</i> (Dolfus, 1892)             | La Indiana                 | ES | 36.75376 | -5.20183  | T_047  | 1.278 | 0.044 | Surf |
| <i>Proasellus parvulus</i> (Sket, 1960)              | Crmelj                     | SI | 45.60372 | 15.17089  | T_048  | 1.425 | 0.034 | Subt |
| <i>Proasellus coiffaiti</i> (Henry & Magniez, 1972)  | Cauneille                  | FR | 43.54494 | 1.04227   | T_044  | 2.054 | 0.174 | Surf |
| <i>Proasellus slovenicus</i> (Sket, 1957)            | Prečna                     | SI | 45.81886 | 15.09865  | T_054  | 1.741 | 0.078 | Subt |
| <i>Proasellus cavaticus</i> (Leydig, 1871)           | Thoiria                    | FR | 46.525   | 5.73389   | T_080  | 1.489 | 0.111 | Subt |
| <i>Bragasellus peltatus</i> (Braga, 1944)            | Lousada                    | PT | 41.28193 | -8.30839  | T_171  | 0.759 | 0.063 | Surf |
| <i>Bragasellus frontellum</i> (Braga, 1964)          | Aboim das Chocas           | PT | 41.91711 | -8.44715  | T_170  | 1.199 | 0.088 | Subt |
| <i>Bragasellus cortesi</i> Afonso, 1989              | Vila Pouca de Aguiar       | PT | 41.49062 | -7.64903  | T_169  | 0.836 | 0.033 | Surf |
| <i>Bragasellus molinai</i> Henry & Magniez, 1988     | Vegacervera                | ES | 42.90665 | -5.56286  | T_163  | 1.174 | 0.132 | Subt |
| <i>Bragasellus lagari</i> Henry & Magniez, 1973      | Gestalgar                  | ES | 39.5969  | -0.84903  | T_021  | 1.556 | 0.071 | Subt |
| <i>Caecidotea kenki</i> (Bowman, 1967)               | Arlington                  | US | 38.92928 | -77.11858 | T_033  | 2.312 | 0.133 | Surf |
| <i>Gallasellus heiligi</i> (Legrand, 1956)           | Saint-Pierre-de-l'Île      | FR | 46.02028 | -0.44917  | T_179  | 1.911 | 0.081 | Subt |
| <i>Asellus (Asellus) aquaticus</i> (Linnaeus, 1758)  | Villeurbanne               | FR | 45.77986 | 4.86802   | T_176  | 2.503 | 0.129 | Surf |
| <i>Atyaephyra desmaresti</i> (Millet, 1831)          | Brissac                    | FR | 43.84349 | 3.69938   | CD_17  | 3.707 | 0.295 | Surf |
| <i>Typhlatia miravetensis</i> Sanz & Platvoet, 1995  | Alcala de Xivert           | ES | 40.25935 | 0.25944   | CD_18  | 4.731 | 0.583 | Subt |
| <i>Dugastella valentima</i> (Ferrer Galdiano, 1924)  | Gestalgar                  | ES | 39.60081 | -0.83171  | CD_19  | 3.745 | 0.314 | Surf |
| <i>Gallocaris inermis</i> (Fage, 1937)               | Sauve                      | FR | 43.94056 | 3.95      | CD_25  | 7.017 | 0.677 | Subt |
| <i>Bythinella eurystoma</i> (Paladhile, 1870)        | Le Vigan                   | FR | 43.92985 | 3.59211   | CD_21  | 0.862 | 0.051 | Surf |
| <i>Bythinella navacellensis</i> Prié & Bichain, 2009 | Saint Maurice de Navacelle | FR | 43.8636  | 3.5264    | CD_22  | 0.923 | 0.035 | Subt |

**Table S7:** Correlation between the coordinates of species along the axes of a repeat community correpondance analysis (COA) and genome size and the ecological status, and phylogenetic signal associated to each axis of the COA. Repeat orphans were removed and repeats were represented using their respective total genome size (TGS). Correlations were tested by comparing phylogenetic generalized least squares models with and without the parameter of interest using a likelihood ratio test. % var: percent variation explained by this axis, coeff: PGLS coefficient, K: Blomberg et al.’s K.

| COA Axis |       | GS      |       | Ecological Status |       | Phylo. signal |         |
|----------|-------|---------|-------|-------------------|-------|---------------|---------|
| Axis     | % var | p-value | coeff | p-value           | coeff | K             | p-value |
| 1        | 12.70 | 0.06    | -0.18 | 0.89              | -0.04 | 3.76          | 0.00 ** |
| 2        | 9.10  | 0.75    | 0.06  | 0.43              | 0.12  | 1.59          | 0.00 ** |
| 3        | 8.10  | 0.13    | -0.29 | 0.61              | 0.08  | 1.16          | 0.01 *  |
| 4        | 7.30  | 0.69    | 0.05  | 0.40              | 0.23  | 0.99          | 0.09    |
| 5        | 7.10  | 0.60    | 0.10  | 0.77              | -0.05 | 0.82          | 0.10    |
| 6        | 6.80  | 0.57    | 0.13  | 0.31              | 0.13  | 0.70          | 0.36    |

**Table S8:** Tajima’s D estimate for 2 pairs of species based on the frequencies of synonymous SNPs and associated test of mutation-drift equilibrium ( $H_0$  : D not different than 0).

| Species              | status | Tajima’s D | p-value |
|----------------------|--------|------------|---------|
| <i>P. beticus</i>    | Surf.  | 2.40       | 0.017*  |
| <i>P. jalionacus</i> | Subt.  | 1.67       | 0.095   |
| <i>P. coiffaiti</i>  | Surf.  | 1.33       | 0.185   |
| <i>P. cavaticus</i>  | Subt.  | 1.35       | 0.178   |

**Table S9:** Aselloidea sequences used to reconstruct phylogenetic relationships. EE: evolutionary unit number as defined in Morvan et al (2013 Syst. Biol.), COI: Genbank accession numbers for COI sequences, 16S: Genbank accession numbers for 16S sequences, 28S: Genbank accession numbers for 28S sequences. Bold accession numbers represent sequences obtained for this study.

| SPECIES                                             | EE    | COI      | 16S             | 28S      |
|-----------------------------------------------------|-------|----------|-----------------|----------|
| <i>Asellus (Asellus) aquaticus</i> (Linnaeus, 1758) | T_172 | DQ144824 |                 | DQ144738 |
|                                                     | T_173 | AY531762 |                 | DQ144740 |
|                                                     | T_175 | DQ144788 |                 | DQ144745 |
|                                                     | T_176 | DQ144816 | <b>KC610270</b> | DQ144746 |
|                                                     | T_174 | DQ144885 |                 | DQ144747 |

|                                                           |        |                 |                 |                 |
|-----------------------------------------------------------|--------|-----------------|-----------------|-----------------|
| <i>Asellus (Asellus) hilgendorfi</i> Bovallius, 1886      | T_177  | AY531829        |                 | DQ144750        |
| <i>Bragasellus comasi</i> Henry & Magniez, 1976           | T_155  | JQ921528        | JQ921672        | JQ921863        |
|                                                           | T_154  | JQ921530        | JQ921674        | JQ921864        |
|                                                           | T_157  | JQ921534        | <b>KC610271</b> | JQ921865        |
|                                                           | T_158  | JQ921529        | JQ921673        |                 |
| <i>Bragasellus cortesi</i> Afonso, 1989                   | T_169  | JQ921537        | JQ921676        | JQ922027        |
| <i>Bragasellus escolai</i> Henry & Magniez, 1978          | T_160  | JQ921540        | <b>KC610272</b> | JQ921866        |
| <i>Bragasellus frontellum</i> (Braga, 1964)               | T_170  | JQ921541        | JQ921678        | <b>KC610419</b> |
| <i>Bragasellus lagari</i> Henry & Magniez, 1973           | T_025  | JQ921525        | JQ921671        | JQ921862        |
|                                                           | T_022  | JQ921545        | JQ921680        | JQ921868        |
|                                                           | T_021  | JQ921547        | JQ921681        | JQ921869        |
|                                                           | T_027  | JQ921555        | JQ921684        | JQ921870        |
|                                                           | T_026  | JQ921544        | JQ921679        |                 |
|                                                           | T_023  | JQ921549        | <b>KC610273</b> |                 |
|                                                           | T_024  | JQ921554        | <b>KC610274</b> |                 |
|                                                           |        |                 |                 |                 |
| <i>Bragasellus lagarioides</i> Henry & Magniez, 1996      | T_156  | JQ921558        | JQ921687        | JQ921873        |
|                                                           | T_162  | JQ921562        | JQ921685        | <b>KC610420</b> |
| <i>Bragasellus molinai</i> Henry & Magniez, 1988          | T_163  | JQ921567        | JQ921688        | JQ921874        |
| <i>Bragasellus peltatus</i> (Braga, 1944)                 | T_171  | JQ921568        | JQ921689        | JQ921875        |
| <i>Bragasellus rouchi</i> Henry & Magniez, 1988           | T_159  | JQ921571        | JQ921690        | JQ921876        |
| <i>Bragasellus stocki</i> Henry & Magniez, 1988           | T_161  | JQ921524        | <b>KC610275</b> | <b>KC610421</b> |
| <i>Caecidotea kenki</i> (Bowman, 1967)                    | T_033  | JQ921575        | <b>KC610276</b> | JQ921877        |
| <i>Chthonasellus bodoni</i> Argano & Messana, 1991        | T_074  | JQ921576        | <b>KC610278</b> | <b>KC610423</b> |
| <i>Gallasellus heilyi</i> (Legrand, 1956)                 | T_178  | JQ921585        | <b>KC610280</b> | JQ921881        |
|                                                           | T_179  | JQ921588        | <b>KC610279</b> | <b>KC610424</b> |
|                                                           | T_180  | JQ921582        | <b>KC610281</b> | <b>KC610425</b> |
| <i>Lirceolus bisetus</i> (Steeves, 1968)                  | T_034  | AY566533        | AY570118        |                 |
| <i>Lirceolus cocytus</i> Lewis, 2001                      | T_029  | AY566528        | AY570114        |                 |
|                                                           | T_028  | AY566544        | AY570130        |                 |
| <i>Lirceolus hardeni</i> Lewis & Bowman, 1996             | T_036  | AY566537        | AY570122        |                 |
|                                                           | T_035  | AY566551        | AY570138        |                 |
| <i>Lirceolus pilus</i> (Steeves, 1968)                    | T_031  | AY566539        | AY570125        |                 |
|                                                           | T_032  | AY566554        | AY570140        |                 |
| <i>Magniezia gardei</i> Magniez, 1978                     | T_014  | JQ921605        | JQ921697        | JQ921883        |
| <i>Mezistenasellus coahuila</i> Cole & Minckley, 1972     | T_018  | AY566478        | AY570149        |                 |
| <i>Proasellus aff. escolai</i> Henry & Magniez, 1982      | T_109  | JQ921021        | <b>KC610299</b> | JQ921884        |
|                                                           | CD_10  |                 | <b>KC610298</b> | <b>KC610439</b> |
| <i>Proasellus aff. lagari</i> Henry & Magniez, 1982       | T_117  | JQ921023        | JQ921700        | <b>KC610442</b> |
| <i>Proasellus albigensis</i> (Magniez, 1965)              | T_126  | JQ921028        | JQ921702        | JQ921886        |
| <i>Proasellus anophthalmus dalmatinus</i> (Karaman, 1955) | CM_001 | <b>KC610503</b> | <b>KC610286</b> | <b>KC610429</b> |
| <i>Proasellus anophthalmus</i> (Karaman, 1934)            | CD_11  | <b>KC610502</b> | <b>KC610285</b> | <b>KC610428</b> |
| <i>Proasellus aquacalidae</i> (Racovitza, 1922)           | T_141  | JQ921033        | <b>KC610288</b> | JQ921887        |
|                                                           | T_140  | JQ921035        | <b>KC610287</b> | JQ921888        |



Supplemental Information of “Less effective selection leads to larger genomes”

|                                                          |       |                 |                 |                 |
|----------------------------------------------------------|-------|-----------------|-----------------|-----------------|
| <i>Proasellus aragonensis</i> Henry & Magniez, 1992      | T_147 | JQ921037        | JQ921705        | JQ921889        |
|                                                          | T_146 | JQ921038        | JQ921706        | <b>KC610430</b> |
| <i>Proasellus arnautovici</i> (Remy, 1932)               | T_149 | JQ921205        | DQ305117        | <b>KC610358</b> |
|                                                          | T_148 | DQ305138        | DQ305115        | <b>KC610451</b> |
| <i>Proasellus arthrodilus</i> (Braga, 1945)              | T_150 | JQ921046        | <b>KC610289</b> | <b>KC610431</b> |
| <i>Proasellus assaforensis</i> Afonso, 1988              | T_128 | JQ921047        | JQ921710        | JQ921893        |
| <i>Proasellus bardaunii</i> Alouf, Henry & Magniez, 1982 | T_049 | JQ921050        | JQ921711        | JQ921894        |
| <i>Proasellus bellesi</i> Henry & Magniez, 1982          | T_115 | JQ921052        | JQ921712        | JQ921895        |
| <i>Proasellus beroni</i> Henry & Magniez, 1968           | T_095 | JQ921055        | <b>KC610290</b> | JQ921896        |
|                                                          | T_097 | JQ921057        | <b>KC610291</b> | JQ921898        |
|                                                          | T_096 | JQ921059        | <b>KC610292</b> | <b>KC610432</b> |
| <i>Proasellus beticus</i> Henry & Magniez, 1992          | T_107 | JQ921061        | JQ921717        | JQ921899        |
| <i>Proasellus boui</i> Henry & Magniez, 1969             | T_039 | JQ921065        | JQ921718        | <b>KC610433</b> |
| <i>Proasellus cantabricus</i> Henry & Magniez, 1968      | T_094 | JQ921067        | JQ921719        | <b>KC610434</b> |
| <i>Proasellus cavaticus</i> (Leydig, 1871)               | T_080 | JQ921072        | JQ921721        | JQ921903        |
|                                                          | T_079 | JQ921076        | JQ921722        | JQ921904        |
|                                                          | T_078 | JQ921077        | JQ921723        | JQ921905        |
|                                                          | T_081 | JQ921081        | <b>KC610168</b> | <b>KC610370</b> |
|                                                          | CD_12 |                 | <b>KC610293</b> | <b>KC610435</b> |
| <i>Proasellus chappuisi</i> Henry & Magniez, 1968        | T_087 | JQ921120        | JQ921732        | <b>KC610341</b> |
| <i>Proasellus chauvini</i> Henry & Magniez, 1978         | T_131 | JQ921125        | <b>KC610294</b> | JQ921915        |
| <i>Proasellus claudei</i> Henry & Magniez, 1996          | T_098 | JQ921129        | JQ921735        | JQ921917        |
| <i>Proasellus coiffaiti</i> (Henry & Magniez, 1972)      | T_044 | JQ921132        | JQ921736        | <b>KC610342</b> |
| <i>Proasellus comasi</i> Henry & Magniez, 1982           | T_112 | JQ921134        | JQ921737        | JQ921919        |
| <i>Proasellus coralis</i> (Dolfus, 1892)                 | T_046 | JQ921161        | JQ921741        | DQ144751        |
|                                                          | T_045 | JQ921141        | <b>KC610282</b> | <b>KC610426</b> |
|                                                          | CD_13 | <b>KC610501</b> | <b>KC610284</b> | <b>KC610427</b> |
|                                                          | T_047 | JQ921158        | <b>KC610283</b> | <b>KC610436</b> |
| <i>Proasellus deminutus</i> (Sket, 1959)                 | T_056 | JQ921175        | JQ921744        | <b>KC610344</b> |
|                                                          | T_053 | JQ921180        | JQ921745        | <b>KC610437</b> |
| <i>Proasellus diana</i> e Pesce & Argano, 1985           | T_102 | JQ921184        | JQ921746        | <b>KC610438</b> |
| <i>Proasellus ebre</i> nsis Henry & Magniez, 1992        | T_089 | JQ921070        | <b>KC610296</b> | JQ921929        |
|                                                          | T_090 | JQ921188        | <b>KC610297</b> | JQ921930        |
| <i>Proasellus escolai</i> Henry & Magniez, 1982          | T_114 | JQ921189        | JQ921749        | JQ921931        |
|                                                          | T_116 | JQ921192        | JQ921750        | JQ921932        |
| <i>Proasellus espanoli</i> Henry & Magniez, 1982         | T_122 | JQ921194        | JQ921751        | JQ921933        |
| <i>Proasellus faesulanus</i> Messina & Caselli, 1995     | T_101 | JQ921197        | <b>KC610098</b> | JQ921934        |
| <i>Proasellus francisc</i> oloi (Chappuis, 1955)         | T_066 | JQ921204        | <b>KC610300</b> | JQ921936        |
|                                                          | T_064 | JQ921200        | <b>KC610301</b> | <b>KC610440</b> |
| <i>Proasellus grafi</i> Henry & Magniez, 2003            | T_091 | JQ921207        | <b>KC610302</b> | JQ921938        |
| <i>Proasellus granadensis</i> Henry & Magniez, 2003      | T_113 | JQ921212        | <b>KC610100</b> | <b>KC610347</b> |
| <i>Proasellus guipuzcoensis</i> Henry & Magniez, 2003    | T_138 | JQ921208        | <b>KC610101</b> | JQ921940        |

Supplemental Information of “Less effective selection leads to larger genomes”

|                                                           |       |          |                 |                 |
|-----------------------------------------------------------|-------|----------|-----------------|-----------------|
| <i>Proasellus hercegovinensis</i> (Karaman, 1933)         | T_050 | JQ921214 | <b>KC610303</b> | JQ921941        |
|                                                           | T_051 | JQ921215 | JQ921760        | JQ921942        |
| <i>Proasellus hermaliensis</i> (Arcangeli, 1938)          | T_104 | JQ921220 | <b>KC610304</b> | <b>KC610349</b> |
| <i>Proasellus ibericus</i> (Braga, 1946)                  | T_118 | JQ921226 | JQ921762        | JQ921944        |
| <i>Proasellus intermedius</i> (Sket, 1965)                | T_055 | JQ921235 | JQ921763        | JQ921945        |
| <i>Proasellus istrianus</i> (Stammer, 1932)               | T_106 | JQ921239 | JQ921764        | <b>KC610441</b> |
| <i>Proasellus jaloniacus</i> Henry & Magniez, 1978        | T_108 | JQ921245 | JQ921765        | JQ921947        |
| <i>Proasellus karamani</i> (Remy, 1934)                   | T_038 | JQ921248 | JQ921766        | JQ921948        |
| <i>Proasellus lagari</i> Henry & Magniez, 1982            | T_125 | JQ921249 | <b>KC610306</b> | JQ921949        |
| <i>Proasellus lescherae</i> Henry & Magniez, 1978         | T_137 | JQ921114 | <b>KC610310</b> | JQ921911        |
|                                                           | T_135 | JQ921254 | JQ921772        | JQ921950        |
|                                                           | T_133 | JQ921258 | <b>KC610307</b> | JQ921951        |
|                                                           | T_136 | JQ921266 | <b>KC610309</b> | JQ921953        |
|                                                           | T_134 | JQ921268 | JQ921771        | <b>KC610443</b> |
|                                                           | T_132 | JQ921262 | <b>KC610308</b> | <b>KC610444</b> |
| <i>Proasellus ligusticus</i> Bodon & Argano, 1982         | T_100 | JQ921275 | <b>KC610312</b> | JQ921956        |
|                                                           | T_099 | JQ921273 | <b>KC610311</b> | <b>KC610445</b> |
| <i>Proasellus margalefi</i> Henry & Magniez, 1982         | T_119 | JQ921280 | JQ921776        | JQ921958        |
|                                                           | T_103 | JQ921278 | JQ921775        | <b>KC610446</b> |
|                                                           | T_120 | JQ921027 | JQ921701        | <b>KC610447</b> |
| <i>Proasellus meijersae</i> Henry & Magniez, 2003         | T_124 | JQ921284 | <b>KC610313</b> | <b>KC610448</b> |
| <i>Proasellus meridianus</i> (Racovitza, 1919)            | T_153 | JQ921309 | <b>KC610314</b> | JQ921961        |
|                                                           | T_152 | JQ921316 | JQ921781        | JQ921962        |
|                                                           | T_151 | JQ921304 | <b>KC610315</b> | <b>KC610353</b> |
| <i>Proasellus micropectinatus</i> Baratti & Messina, 1990 | T_086 | JQ921327 | <b>KC610107</b> | <b>KC610354</b> |
| <i>Proasellus n. sp.</i> (Alviela)                        | T_127 | JQ921337 | JQ921785        | JQ921967        |
| <i>Proasellus n. sp.</i> (Aquamalas Pontones)             | T_121 | JQ921110 | JQ921727        | JQ921909        |
| <i>Proasellus n. sp.</i> (Aquerreta)                      | T_139 | JQ921340 | JQ921786        | JQ921968        |
| <i>Proasellus n. sp.</i> (Boreon)                         | T_077 | JQ921344 | <b>KC610316</b> | JQ921969        |
|                                                           | T_076 | JQ921345 | JQ921788        | <b>KC610449</b> |
| <i>Proasellus n. sp.</i> (Cantarana)                      | T_072 | JQ921018 | <b>KC610295</b> | JQ921925        |
| <i>Proasellus n. sp.</i> (Lentegi)                        | T_111 | JQ921346 | JQ921790        | JQ921966        |
| <i>Proasellus n. sp.</i> (Maglia)                         | T_065 | JQ921349 | JQ921791        | JQ921971        |
| <i>Proasellus n. sp.</i> (Martino)                        | T_061 | JQ921350 | JQ921792        | JQ921972        |
| <i>Proasellus n. sp.</i> (Mazandaran)                     | T_037 | JQ921336 | JQ921789        | JQ921970        |
| <i>Proasellus n. sp.</i> (Mescla)                         | T_063 | JQ921353 | <b>KC610317</b> | JQ921973        |
| <i>Proasellus n. sp.</i> (Pesio Santa)                    | T_075 | JQ921579 | <b>KC610277</b> | <b>KC610422</b> |
| <i>Proasellus n. sp.</i> (Sanguiniere)                    | T_062 | JQ921355 | <b>KC610318</b> | JQ921974        |
| <i>Proasellus n. sp.</i> (Sospel)                         | T_073 | JQ921357 | JQ921795        | JQ921975        |
| <i>Proasellus n. sp.</i> (Verclause)                      | T_070 | JQ921359 | <b>KC610319</b> | JQ921976        |
| <i>Proasellus n. sp.</i> (Verclause)                      | T_071 | JQ921361 | <b>KC610320</b> | JQ921977        |

Supplemental Information of “Less effective selection leads to larger genomes”

|                                                                |       |                 |                 |                 |
|----------------------------------------------------------------|-------|-----------------|-----------------|-----------------|
| <i>Proasellus navarrensis</i> Henry & Magniez, 2003            | T_093 | JQ921328        | JQ921783        | JQ921964        |
| <i>Proasellus nolli</i> (Karaman, 1952)                        | T_040 | JQ921332        | <b>KC610206</b> | <b>KC610393</b> |
| <i>Proasellus ortizi</i> Henry & Magniez, 1992                 | T_092 | JQ921364        | JQ921798        | JQ921978        |
| <i>Proasellus oviensis</i> Henry & Magniez, 2003               | T_105 | JQ921365        | JQ921799        | JQ921979        |
| <i>Proasellus parvulus</i> (Sket, 1960)                        | T_048 | JQ921366        | JQ921800        | <b>KC610355</b> |
| <i>Proasellus pavani</i> (Arcangeli, 1942)                     | T_052 | JQ921370        | JQ921801        | JQ921981        |
| <i>Proasellus racovitzai</i> Henry & Magniez, 1972             | T_110 | JQ921372        | <b>KC610321</b> | JQ921982        |
| <i>Proasellus rectangulatus</i> Afonso, 1982                   | T_129 | JQ921373        | JQ921803        | JQ921983        |
| <i>Proasellus rectus</i> Afonso, 1982                          | T_130 | JQ921376        | JQ921804        | JQ921984        |
| <i>Proasellus rouchi</i> Henry, 1980                           | T_082 | JQ921383        | JQ921805        | JQ921985        |
| <i>Proasellus slavus</i> (Remy, 1948)                          | T_043 | JQ921386        | JQ921806        | JQ921986        |
|                                                                | T_041 | JQ921389        | <b>KC610193</b> | <b>KC610394</b> |
|                                                                | T_042 | JQ921411        | <b>KC610212</b> | <b>KC610398</b> |
| <i>Proasellus slovenicus</i> (Sket, 1957)                      | T_054 | JQ921413        | JQ921810        | JQ921990        |
| <i>Proasellus solanasi</i> Henry & Magniez, 1972               | CD_15 | <b>KC610504</b> | <b>KC610322</b> | <b>KC610452</b> |
| <i>Proasellus sp.</i> (type locality of <i>P. goubaultae</i> ) | T_123 | JQ921112        | JQ921728        | <b>KC610346</b> |
| <i>Proasellus spelaeus</i> (Racovitza, 1922)                   | CD_16 | <b>KC610505</b> | <b>KC610323</b> | <b>KC610360</b> |
|                                                                | T_142 | JQ921416        | JQ921811        | <b>KC610450</b> |
| <i>Proasellus stocki</i> Henry & Magniez, 2003                 | T_088 | JQ921116        | JQ921730        | JQ921913        |
| <i>Proasellus strouhali</i> (Karaman, 1955)                    | T_067 | JQ921432        | <b>KC610226</b> | JQ921995        |
|                                                                | T_068 | JQ921423        | JQ921813        | <b>KC610400</b> |
| <i>Proasellus synaselloides</i> (Henry, 1963)                  | T_083 | JQ921445        | <b>KC610240</b> | JQ921996        |
|                                                                | T_084 | JQ921449        | <b>KC610244</b> | JQ921998        |
|                                                                | T_085 | JQ921443        | JQ921817        | <b>KC610410</b> |
| <i>Proasellus valdensis</i> (Chappuis, 1948)                   | T_069 | JQ921469        | <b>KC610147</b> | <b>KC610453</b> |
| <i>Proasellus vandeli</i> Magniez & Henry, 1969                | T_143 | JQ921488        | JQ921822        | JQ922001        |
|                                                                | T_145 | JQ921489        | JQ921823        | <b>KC610368</b> |
|                                                                | T_144 | JQ921486        | <b>KC610324</b> | <b>KC610454</b> |
| <i>Proasellus vulgaris</i> (Sket, 1965)                        | T_057 | JQ921493        | <b>KC610325</b> | JQ922003        |
| <i>Proasellus walteri</i> (Chappuis, 1948)                     | T_060 | JQ921513        | <b>KC610326</b> | JQ922004        |
|                                                                | T_058 | JQ921516        | JQ921829        | JQ922006        |
|                                                                | T_059 | JQ921497        | <b>KC610258</b> | <b>KC610415</b> |
| <i>Remasellus parvus</i> (Steeves, 1964)                       | T_030 | AY566472        | AY570143        |                 |
| <i>Stenasellus breuili</i> Racovitza, 1924                     | T_015 | JQ921607        | <b>KC610327</b> |                 |
| <i>Stenasellus buili</i> Remy, 1949                            | T_012 | JQ921611        | JQ921831        |                 |
|                                                                | T_011 | JQ921613        | JQ921832        |                 |
| <i>Stenasellus galhanae</i> Braga, 1962                        | T_019 | JQ921616        | JQ921833        | JQ922009        |
| <i>Stenasellus racovitzai</i> Razzauti, 1925                   | T_016 | JQ921624        | <b>KC610328</b> | <b>KC610455</b> |
|                                                                | T_017 | JQ921622        | JQ921837        | <b>KC610456</b> |
| <i>Stenasellus virei</i> Dollfus, 1897                         | T_008 | JQ921627        | JQ921838        | JQ922012        |
|                                                                | T_005 | JQ921642        | <b>KC610332</b> | JQ922013        |
|                                                                | T_002 | JQ921635        | <b>KC610334</b> | JQ922014        |

|                                                    |       |          |                 |                 |
|----------------------------------------------------|-------|----------|-----------------|-----------------|
|                                                    | T_010 | JQ921645 | JQ921844        | JQ922015        |
|                                                    | T_004 | JQ921617 | JQ921834        | JQ922016        |
|                                                    | T_182 | JQ921650 | JQ921849        | JQ922017        |
|                                                    | T_181 | JQ921660 | JQ921850        | JQ922018        |
|                                                    | T_001 | JQ921669 | JQ921855        | JQ922019        |
|                                                    | T_185 | JQ921666 | JQ921853        | JQ922020        |
|                                                    | T_184 | JQ921648 | <b>KC610333</b> | JQ922029        |
|                                                    | T_006 | JQ921658 | <b>KC610329</b> | <b>KC610457</b> |
|                                                    | T_013 | JQ921629 | JQ921839        | <b>KC610458</b> |
|                                                    | T_009 | JQ921639 | <b>KC610331</b> | <b>KC610459</b> |
|                                                    | T_007 | JQ921664 | JQ921852        | <b>KC610460</b> |
|                                                    | T_183 | JQ921667 | JQ921854        | <b>KC610461</b> |
|                                                    | T_003 | JQ921654 | JQ921847        |                 |
|                                                    | T_186 | JQ921632 | <b>KC610330</b> |                 |
| <i>Synasellus braгаianus</i> Henry & Magniez, 1987 | T_168 | JQ921596 | JQ921858        | JQ922024        |
|                                                    | T_165 | JQ921592 | <b>KC610335</b> | <b>KC610462</b> |
| <i>Synasellus meijersae</i> Henry & Magniez, 1987  | T_167 | JQ921598 | <b>KC610336</b> | JQ922025        |
| <i>Synasellus n. sp.</i> (Aboim)                   | T_164 | JQ921602 | JQ921860        | <b>KC610463</b> |
| <i>Synasellus n. sp.</i> (Los Tojos)               | T_166 | JQ921603 | <b>KC610337</b> | <b>KC610464</b> |
